# Supplementary material
Source: PubMed Central journal article supplement (PMC3754542)
Supplement: EC.00003-13_zek999094133so1.pdf [file EC.00003-13_zek999094133so1.pdf]

# Figure S1. Kojic acid production and developmental phenotype of AoHDACs disruptants and heterokaryon strain

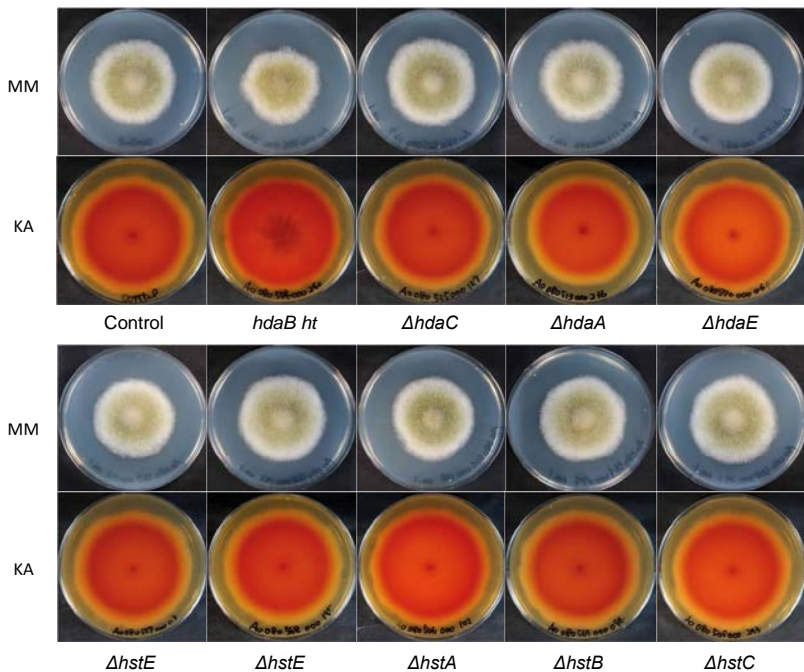

MM and KA show the morphological phenotype and kojic acid production plate assays of the indicated strains, respectively.

**Figure S2. Phenotypic analysis of AoHDACs disruptants and hetrokaryon strain on plates and submerged cultures.**

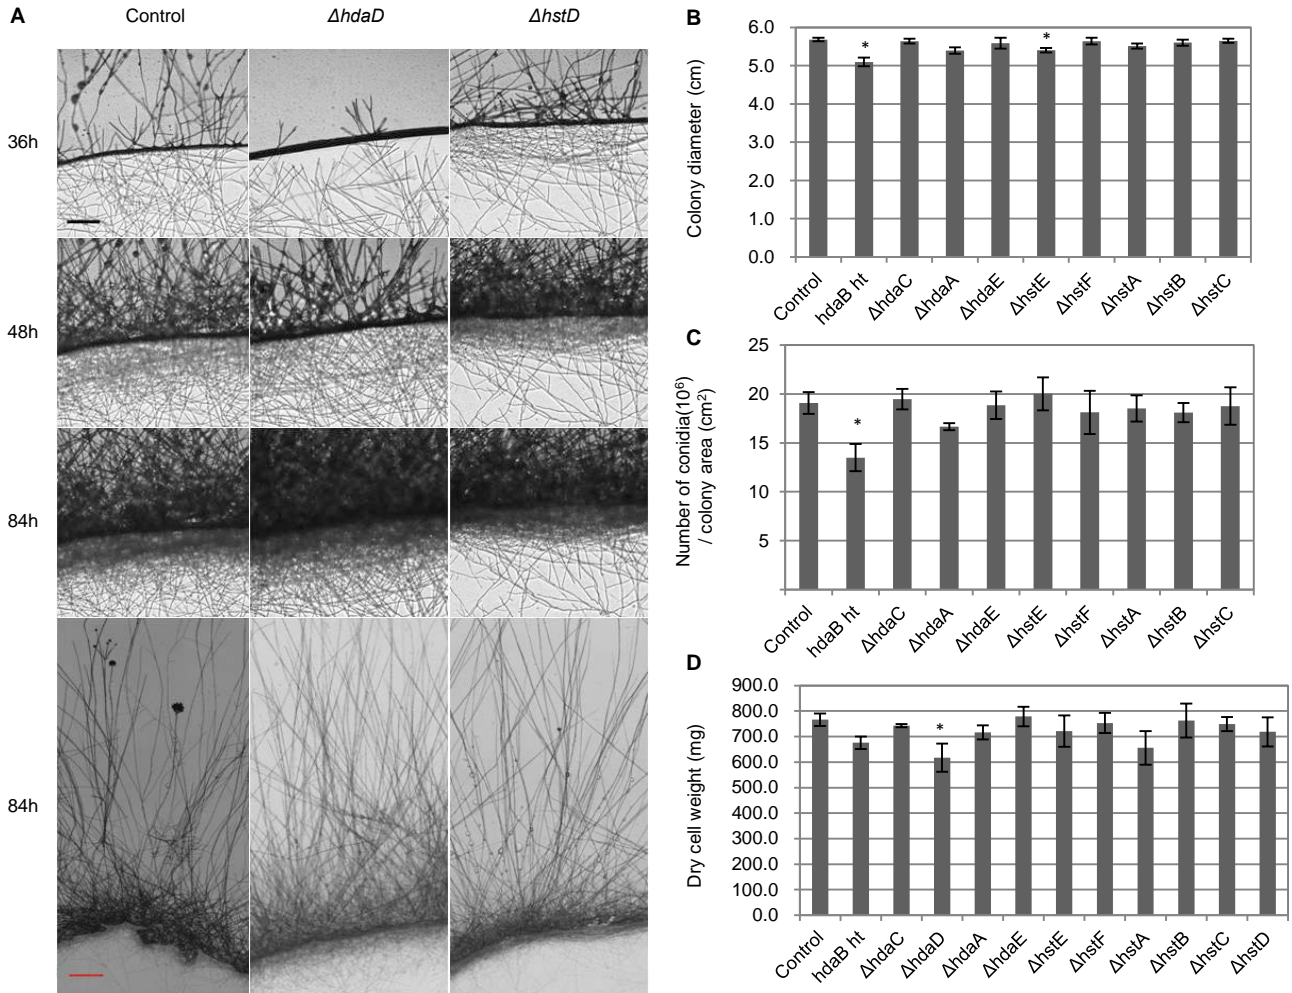

(A) Time-lapse microscopic analysis of  $\Delta hstD$  and  $\Delta hdaD$ . The pictures were taken at 36, 48, and 84 hr of incubation (black scale bar, 200  $\mu\text{m}$ ; red scale bar, 500  $\mu\text{m}$ ). (B-D) Quantification of colony diameter, conidiation rate, and mycelial dry cell weight of AoHDACs disruptants or the heterokaryon strain, respectively. The colony diameter and conidiation rates were measured on plate cultures. Dry cell weight was measured on submerged cultures. All data are represented as means  $\pm$  s.d. (n=3); \* $p < 0.01$ , t-test

**Figure S3. Phylogenetic analysis of *hstD* in filamentous fungi**

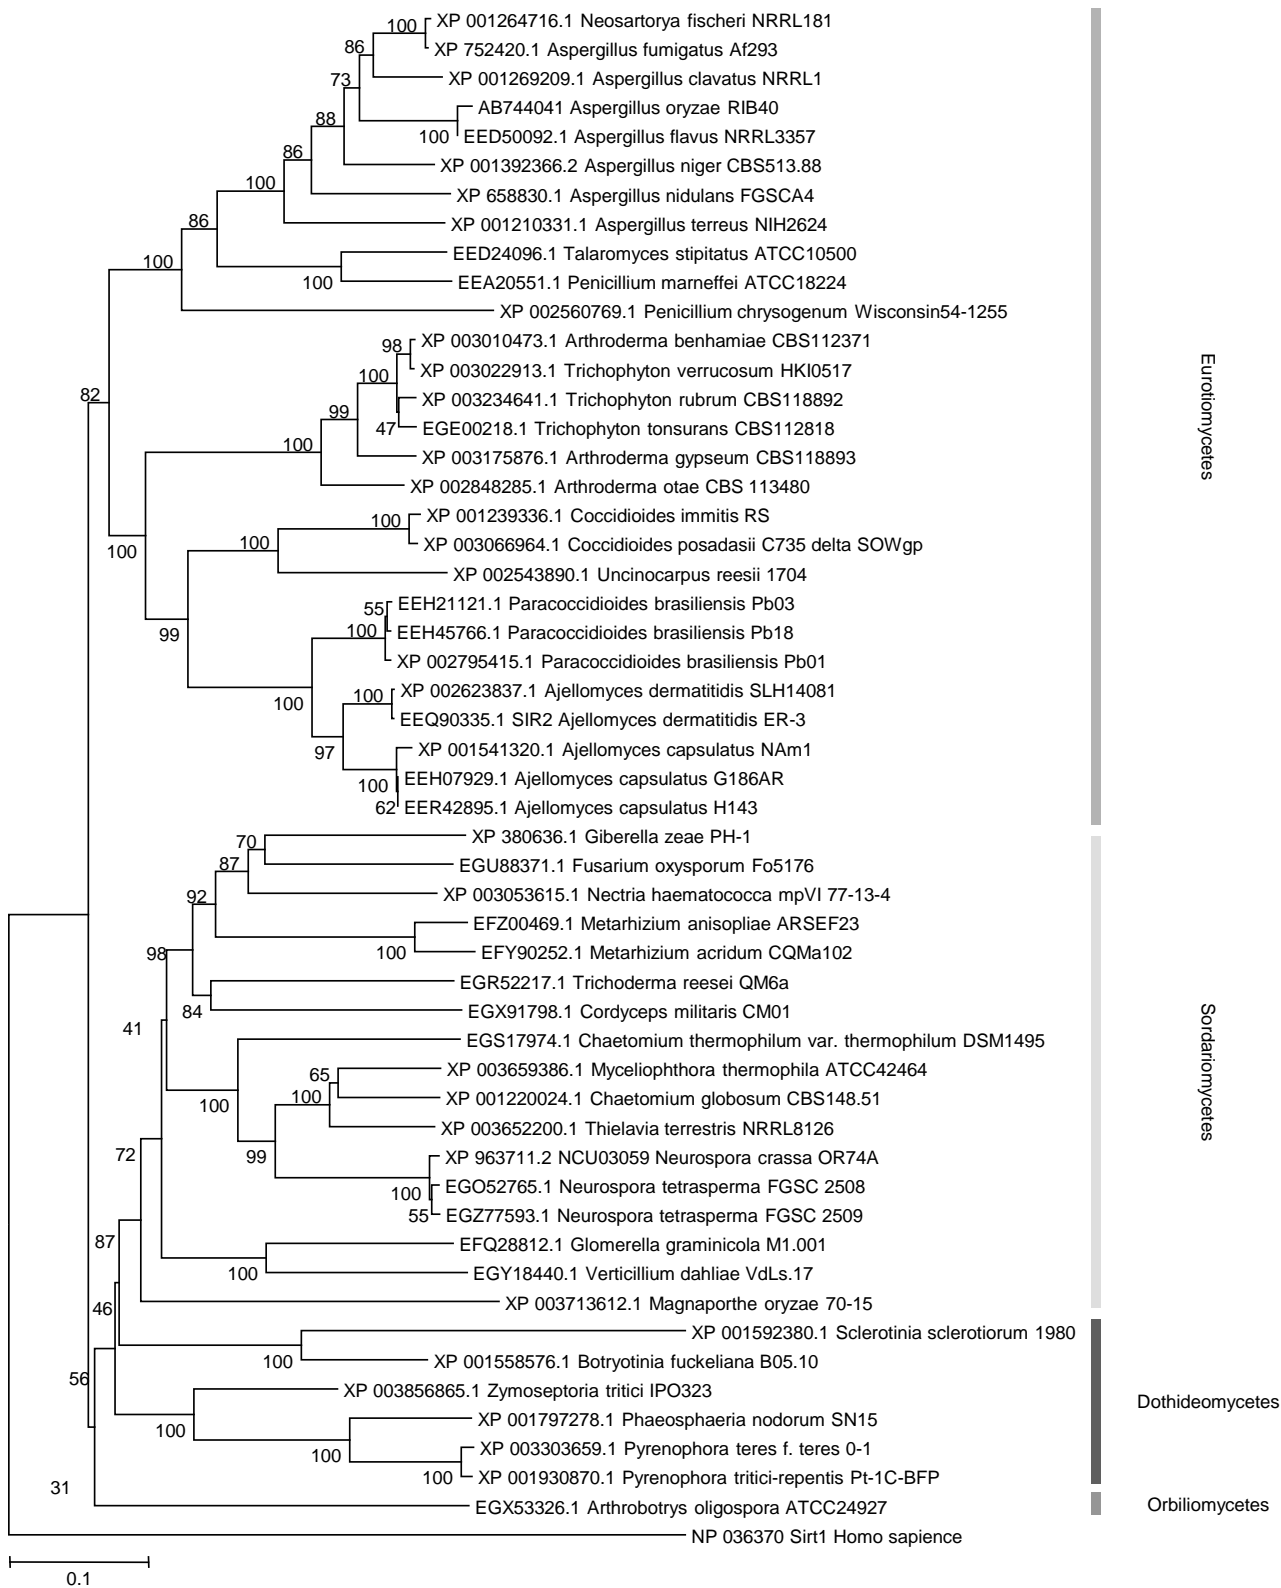

The Genebank accession numbers and species names are indicated for each branch. The numbers at the nodes are bootstrap values obtained from 1000 replicates and are indicated as percentages. The scale bar indicates a distance corresponding to 0.1 amino acid substitutions per site. Each class of ascomycetes is shown at the right. *Sirt1* is used as the out-group in this phylogenetic analysis.

Figure S4. Whole genome distribution of FunCat level 1 categories

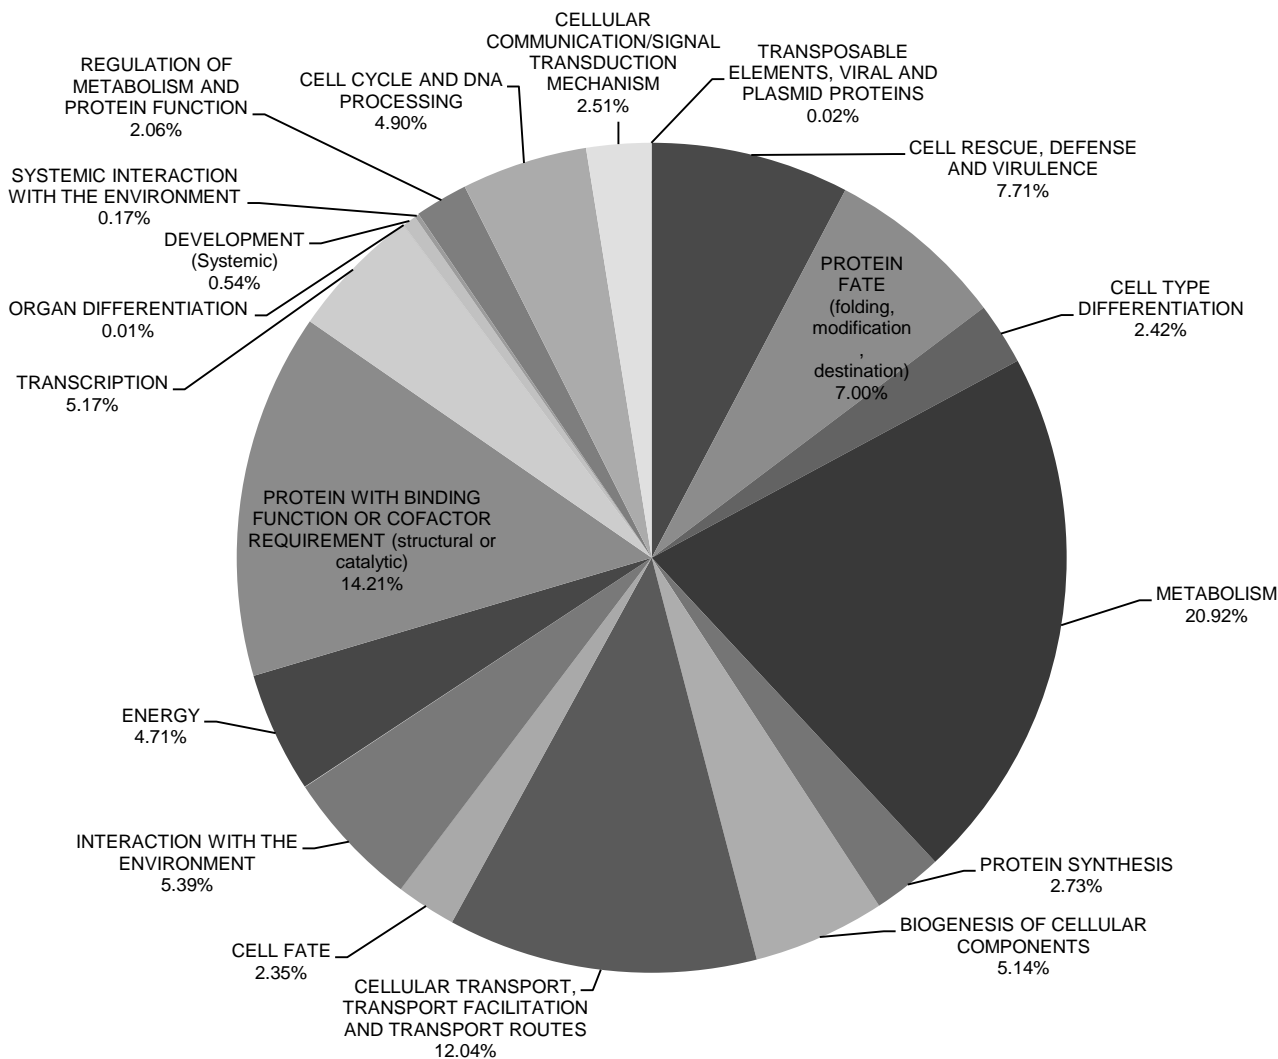

This pie-chart indicates the distribution of all mapped genes of *A. oryzae* RIB40 genome in the categories of FunCat level 1. Percentages of each category was calculated against all mapped genes. This result was imported from FungiFun software (<https://sbi.hki-jena.de/FungiFun/FungiFun.cgi>) and used as a reference to analyzed FunCat level 1 enrichment analysis. Details of each category are available at the FunCat Database ([http://mips.helmholtzmuenchen.de/proj/funecatDB/search\\_main\\_frame.html](http://mips.helmholtzmuenchen.de/proj/funecatDB/search_main_frame.html)).

Figure S5. Whole genome distribution of FunCat level 2 categories

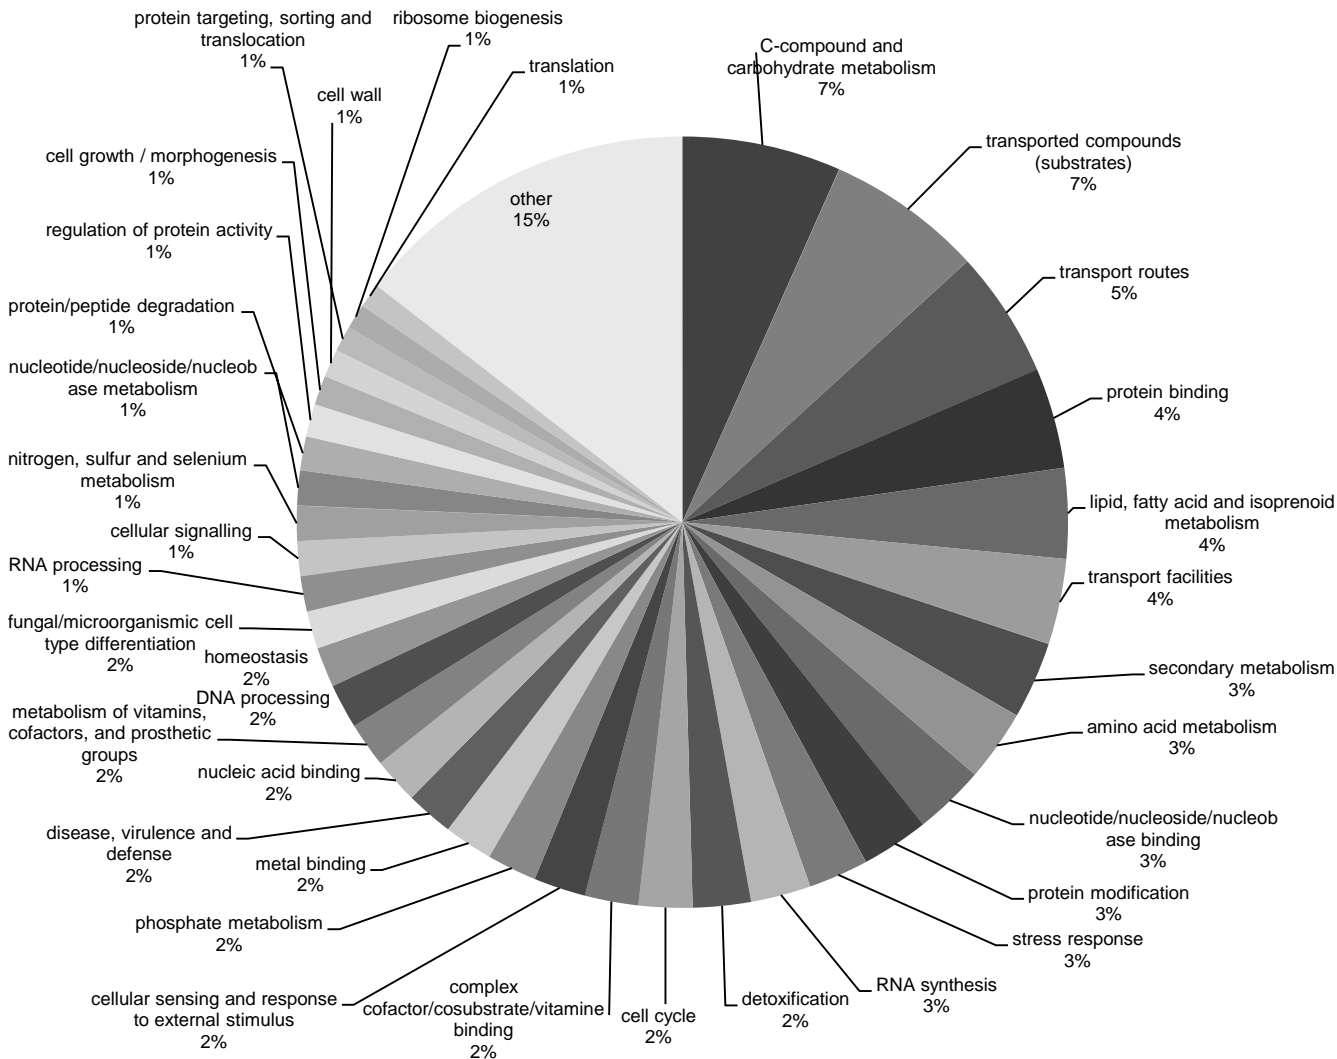

This pie-chart indicates the distribution of all mapped genes of *A. oryzae* RIB40 genome in the categories of FunCat level 2. Percentages of each category was calculated against all mapped genes. Miner categories (< 1%) were indicated as “other” in this pie chart. This result was imported from FungiFun software ( <https://sbi.hki-jena.de/FungiFun/FungiFun.cgi>) and used as a reference for the analysis of FunCat level 2 enrichment analysis. Details of each category are available at the FunCat Database ([http://mips.helmholtzmuenchen.de/proj/funcatDB/search\\_main\\_frame.html](http://mips.helmholtzmuenchen.de/proj/funcatDB/search_main_frame.html)).

**Figure S6. Expression profiling of *laeA*, *kojA*, and *ipnA* in *OE::laeA* and  $\Delta$ *hstD* *OE::laeA* strains, respectively**

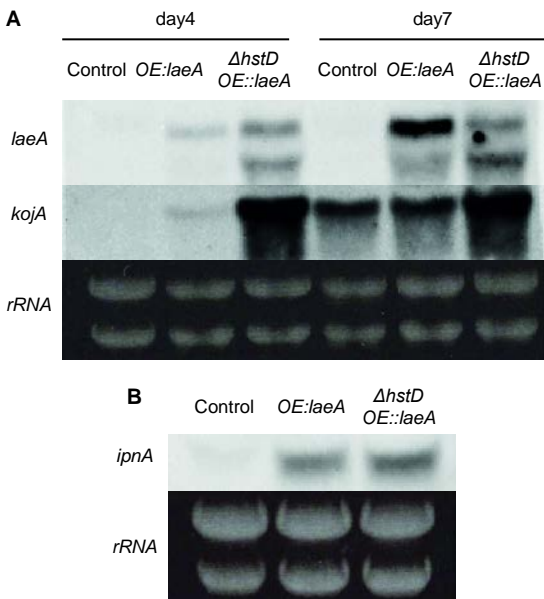

**(A)** Northern hybridization of *laeA* and *kojA*, respectively. The culture time of the indicated strain is shown at the top of the panel. *rRNA* is shown as the loading control. The analyzed gene is indicated on the left side of each blot

**(B)** Northern hybridization of the penicillin biosynthetic gene *ipnA*. *rRNA* is shown as the loading control. The *adeA*<sup>+</sup> *pUSA*<sup>+</sup> strain was used as the control, and the *OE::laeA* *adeA*<sup>+</sup> strain represents *OE::laeA* in this figure.

**Table S1. Strain used in this study**

| Name                                              | Parental strain          | Genotype <sup>b</sup>                                                                                                                                                           | Reference         |
|---------------------------------------------------|--------------------------|---------------------------------------------------------------------------------------------------------------------------------------------------------------------------------|-------------------|
| <i>RIB40</i>                                      |                          | wild type                                                                                                                                                                       | NRIB <sup>a</sup> |
| <i>NSR-ΔLD2</i>                                   | <i>RIB40</i>             | <i>niaD</i> <sup>-</sup> <i>sC</i> <sup>-</sup> <i>adeA</i> <sup>-</sup> <i>argB::adeA</i> <sup>-</sup> <i>ΔligD::argB</i>                                                      | (25)              |
| <i>adeA</i> <sup>+</sup>                          | <i>NSR-ΔLD2</i>          | <i>niaD</i> <sup>-</sup> <i>sC</i> <sup>-</sup> <i>adeA</i> <sup>-</sup> <i>argB::adeA</i> <sup>-</sup> <i>ΔligD::argB</i> <i>adeA</i> <sup>+</sup>                             | this study        |
| <i>pUSA</i> <sup>+</sup>                          | <i>NSR-ΔLD2</i>          | <i>niaD</i> <sup>-</sup> <i>sC</i> <sup>-</sup> <i>adeA</i> <sup>-</sup> <i>argB::adeA</i> <sup>-</sup> <i>ΔligD::argB</i> <i>pUSA</i> <sup>+</sup>                             | this study        |
| <i>adeA</i> <sup>+</sup> <i>sC</i> <sup>+</sup>   | <i>adeA</i> <sup>+</sup> | <i>niaD</i> <sup>-</sup> <i>sC</i> <sup>-</sup> <i>adeA</i> <sup>-</sup> <i>argB::adeA</i> <sup>-</sup> <i>ΔligD::argB</i> <i>adeA</i> <sup>+</sup> <i>AnsC</i> <sup>+</sup>    | this study        |
| <i>adeA</i> <sup>+</sup> <i>pUSA</i> <sup>+</sup> | <i>adeA</i> <sup>+</sup> | <i>niaD</i> <sup>-</sup> <i>sC</i> <sup>-</sup> <i>adeA</i> <sup>-</sup> <i>argB::adeA</i> <sup>-</sup> <i>ΔligD::argB</i> <i>adeA</i> <sup>+</sup> <i>pUSA</i> <sup>+</sup>    | this study        |
| <i>hdaB ht</i> <sup>c</sup>                       | <i>NSR-ΔLD2</i>          | <i>niaD</i> <sup>-</sup> <i>sC</i> <sup>-</sup> <i>adeA</i> <sup>-</sup> <i>argB::adeA</i> <sup>-</sup> <i>ΔligD::argB</i> <i>ΔhdaB::adeA</i> <i>hdaB</i>                       | this study        |
| <i>ΔhdaC</i>                                      | <i>NSR-ΔLD2</i>          | <i>niaD</i> <sup>-</sup> <i>sC</i> <sup>-</sup> <i>adeA</i> <sup>-</sup> <i>argB::adeA</i> <sup>-</sup> <i>ΔligD::argB</i> <i>ΔhdaC::adeA</i>                                   | this study        |
| <i>ΔhdaD</i>                                      | <i>NSR-ΔLD2</i>          | <i>niaD</i> <sup>-</sup> <i>sC</i> <sup>-</sup> <i>adeA</i> <sup>-</sup> <i>argB::adeA</i> <sup>-</sup> <i>ΔligD::argB</i> <i>ΔhdaD::adeA</i>                                   | this study        |
| <i>ΔhdaA</i>                                      | <i>NSR-ΔLD2</i>          | <i>niaD</i> <sup>-</sup> <i>sC</i> <sup>-</sup> <i>adeA</i> <sup>-</sup> <i>argB::adeA</i> <sup>-</sup> <i>ΔligD::argB</i> <i>ΔhdaA::adeA</i>                                   | this study        |
| <i>ΔhdaE</i>                                      | <i>NSR-ΔLD2</i>          | <i>niaD</i> <sup>-</sup> <i>sC</i> <sup>-</sup> <i>adeA</i> <sup>-</sup> <i>argB::adeA</i> <sup>-</sup> <i>ΔligD::argB</i> <i>ΔhdaE::adeA</i>                                   | this study        |
| <i>ΔhstA</i>                                      | <i>NSR-ΔLD2</i>          | <i>niaD</i> <sup>-</sup> <i>sC</i> <sup>-</sup> <i>adeA</i> <sup>-</sup> <i>argB::adeA</i> <sup>-</sup> <i>ΔligD::argB</i> <i>ΔhstA::adeA</i>                                   | this study        |
| <i>ΔhstB</i>                                      | <i>NSR-ΔLD2</i>          | <i>niaD</i> <sup>-</sup> <i>sC</i> <sup>-</sup> <i>adeA</i> <sup>-</sup> <i>argB::adeA</i> <sup>-</sup> <i>ΔligD::argB</i> <i>ΔhstB::adeA</i>                                   | this study        |
| <i>ΔhstC</i>                                      | <i>NSR-ΔLD2</i>          | <i>niaD</i> <sup>-</sup> <i>sC</i> <sup>-</sup> <i>adeA</i> <sup>-</sup> <i>argB::adeA</i> <sup>-</sup> <i>ΔligD::argB</i> <i>ΔhstC::adeA</i>                                   | this study        |
| <i>ΔhstD</i>                                      | <i>NSR-ΔLD2</i>          | <i>niaD</i> <sup>-</sup> <i>sC</i> <sup>-</sup> <i>adeA</i> <sup>-</sup> <i>argB::adeA</i> <sup>-</sup> <i>ΔligD::argB</i> <i>ΔhstD::adeA</i>                                   | this study        |
| <i>ΔhstE</i>                                      | <i>NSR-ΔLD2</i>          | <i>niaD</i> <sup>-</sup> <i>sC</i> <sup>-</sup> <i>adeA</i> <sup>-</sup> <i>argB::adeA</i> <sup>-</sup> <i>ΔligD::argB</i> <i>ΔhstE::adeA</i>                                   | this study        |
| <i>ΔhstF</i>                                      | <i>NSR-ΔLD2</i>          | <i>niaD</i> <sup>-</sup> <i>sC</i> <sup>-</sup> <i>adeA</i> <sup>-</sup> <i>argB::adeA</i> <sup>-</sup> <i>ΔligD::argB</i> <i>ΔhstF::adeA</i>                                   | this study        |
| <i>ΔlaeA</i>                                      | <i>NSR-ΔLD2</i>          | <i>niaD</i> <sup>-</sup> <i>sC</i> <sup>-</sup> <i>adeA</i> <sup>-</sup> <i>argB::adeA</i> <sup>-</sup> <i>ΔligD::argB</i> <i>ΔlaeA::adeA</i>                                   | this study        |
| <i>ΔhstD sC</i> <sup>+</sup>                      | <i>ΔhstD</i>             | <i>niaD</i> <sup>-</sup> <i>sC</i> <sup>-</sup> <i>adeA</i> <sup>-</sup> <i>argB::adeA</i> <sup>-</sup> <i>ΔligD::argB</i> <i>ΔhstD::adeA</i> <i>AnsC</i> <sup>+</sup>          | this study        |
| <i>ΔhstD pUSA</i> <sup>+</sup>                    | <i>ΔhstD</i>             | <i>niaD</i> <sup>-</sup> <i>sC</i> <sup>-</sup> <i>adeA</i> <sup>-</sup> <i>argB::adeA</i> <sup>-</sup> <i>ΔligD::argB</i> <i>ΔhstD::adeA</i> <i>pUSA</i> <sup>+</sup>          | this study        |
| <i>ΔhstD OE::laeA</i>                             | <i>ΔhstD</i>             | <i>niaD</i> <sup>-</sup> <i>sC</i> <sup>-</sup> <i>adeA</i> <sup>-</sup> <i>argB::adeA</i> <sup>-</sup> <i>ΔligD::argB</i> <i>ΔhstD::adeA</i> <i>pUSlaeA</i> <sup>+</sup>       | this study        |
| <i>ΔlaeA sC</i> <sup>+</sup>                      | <i>ΔlaeA</i>             | <i>niaD</i> <sup>-</sup> <i>sC</i> <sup>-</sup> <i>adeA</i> <sup>-</sup> <i>argB::adeA</i> <sup>-</sup> <i>ΔligD::argB</i> <i>ΔlaeA::adeA</i> <i>AnsC</i> <sup>+</sup>          | this study        |
| <i>ΔlaeA pUSA</i> <sup>+</sup>                    | <i>ΔlaeA</i>             | <i>niaD</i> <sup>-</sup> <i>sC</i> <sup>-</sup> <i>adeA</i> <sup>-</sup> <i>argB::adeA</i> <sup>-</sup> <i>ΔligD::argB</i> <i>ΔlaeA::adeA</i> <i>pUSA</i> <sup>+</sup>          | this study        |
| <i>ΔlaeA OE::hstD</i>                             | <i>ΔlaeA</i>             | <i>niaD</i> <sup>-</sup> <i>sC</i> <sup>-</sup> <i>adeA</i> <sup>-</sup> <i>argB::adeA</i> <sup>-</sup> <i>ΔligD::argB</i> <i>ΔlaeA::adeA</i> <i>pUSHstD</i> <sup>+</sup>       | this study        |
| <i>OE::laeA</i>                                   | <i>NSR-ΔLD2</i>          | <i>niaD</i> <sup>-</sup> <i>sC</i> <sup>-</sup> <i>adeA</i> <sup>-</sup> <i>argB::adeA</i> <sup>-</sup> <i>ΔligD::argB</i> <i>pUSlaeA</i> <sup>+</sup>                          | this study        |
| <i>OE::hstD</i>                                   | <i>NSR-ΔLD2</i>          | <i>niaD</i> <sup>-</sup> <i>sC</i> <sup>-</sup> <i>adeA</i> <sup>-</sup> <i>argB::adeA</i> <sup>-</sup> <i>ΔligD::argB</i> <i>pUSHstD</i> <sup>+</sup>                          | this study        |
| <i>ΔhstD ΔlaeA</i>                                | <i>ΔhstD</i>             | <i>niaD</i> <sup>-</sup> <i>sC</i> <sup>-</sup> <i>adeA</i> <sup>-</sup> <i>argB::adeA</i> <sup>-</sup> <i>ΔligD::argB</i> <i>ΔhstD::adeA</i> <i>ΔlaeA::AnsC</i>                | this study        |
| <i>hstD</i> <sup>+</sup>                          | <i>ΔhstD</i>             | <i>niaD</i> <sup>-</sup> <i>sC</i> <sup>-</sup> <i>adeA</i> <sup>-</sup> <i>argB::adeA</i> <sup>-</sup> <i>ΔligD::argB</i> <i>ΔhstD::adeA::hstD::AnsC</i>                       | this study        |
| <i>OE::laeA adeA</i> <sup>+</sup>                 | <i>OE::laeA</i>          | <i>niaD</i> <sup>-</sup> <i>sC</i> <sup>-</sup> <i>adeA</i> <sup>-</sup> <i>argB::adeA</i> <sup>-</sup> <i>ΔligD::argB</i> <i>pUSlaeA</i> <sup>+</sup> <i>adeA</i> <sup>+</sup> | this study        |
| <i>OE::hstD adeA</i> <sup>+</sup>                 | <i>OE::hstD</i>          | <i>niaD</i> <sup>-</sup> <i>sC</i> <sup>-</sup> <i>adeA</i> <sup>-</sup> <i>argB::adeA</i> <sup>-</sup> <i>ΔligD::argB</i> <i>pUSHstD</i> <sup>+</sup> <i>adeA</i> <sup>+</sup> | this study        |

<sup>a</sup>National Research institute of Brewing

<sup>b</sup>*AnsC*: *Aspergillus nidulans sC*

<sup>c</sup>*ht*: heterokaryon

**Table S2. List of sequence accession numbers used in this study**

| <i>Saccharomyces cerevisiae</i> |                  | <i>Homo sapiens</i>    |                  | <i>Neurospora crassa</i> |                  | <i>Aspergillus nidulans</i> |                  | <i>Aspergillus oryzae</i> |                  |
|---------------------------------|------------------|------------------------|------------------|--------------------------|------------------|-----------------------------|------------------|---------------------------|------------------|
| Gene <sup>a</sup>               | Accession number | Gene <sup>a</sup>      | Accession number | Gene <sup>a</sup>        | Accession number | Gene <sup>a</sup>           | Accession number | Gene <sup>a</sup>         | Accession number |
| <b>Classical HDACs family</b>   |                  |                        |                  |                          |                  |                             |                  |                           |                  |
| <i>rpd3</i>                     | YNL330C          | <i>hdac1 / Hsrpd3</i>  | NP_004955        | <i>hda3 / Ncrpd3</i>     | NCU00824         | <i>rpdA / Anrpd3</i>        | AN4493           | <i>hdaB / Aorpd3</i>      | AB744040         |
|                                 |                  | <i>hdac2 / Hsrpd3</i>  | NP_001518        |                          |                  |                             |                  | <i>hdaC / Aorpd3</i>      | AO080525000127   |
|                                 |                  | <i>hdac3 / Hsrpd3</i>  | NP_003874        |                          |                  |                             |                  |                           |                  |
| <i>hos2</i>                     | YGL194C          |                        |                  | <i>hda2 / Nchos2</i>     | NCU02795         | <i>hosA / Anhos2</i>        | AN3806           | <i>hdaD / Aohos2</i>      | AO080511000459   |
| <i>hos1</i>                     | YPR068C          |                        |                  |                          |                  |                             |                  |                           |                  |
| <i>hda1</i>                     | YRL021W          | <i>hdac6 / Hshda1</i>  | NP_006035        | <i>hda1 / Nchda1</i>     | NCU01525         | <i>hdaA / Anhda1</i>        | AN8024           | <i>hdaA / Aohda1</i>      | AO080513000236   |
|                                 |                  | <i>hdac10 / Hshda1</i> | NP_114408        |                          |                  |                             |                  |                           |                  |
| <i>hos3</i>                     | YPL116W          |                        |                  | <i>hda4 / Nchos3</i>     | NCU07018         | <i>hosB / Anhos3</i>        | AN7019           | <i>hdaE / Aohos3</i>      | AO080570000061   |
|                                 |                  | <i>hdac4</i>           | NP_006028        |                          |                  |                             |                  |                           |                  |
|                                 |                  | <i>hdac5</i>           | NP_001015053     |                          |                  |                             |                  |                           |                  |
|                                 |                  | <i>hdac7</i>           | NP_056216        |                          |                  |                             |                  |                           |                  |
|                                 |                  | <i>hdac8</i>           | NP_060956        |                          |                  |                             |                  |                           |                  |
|                                 |                  | <i>hdac9</i>           | NP_055522        |                          |                  |                             |                  |                           |                  |
|                                 |                  | <i>hdac11</i>          | NP_079103        |                          |                  |                             |                  |                           |                  |
| <b>The Sirtuin family</b>       |                  |                        |                  |                          |                  |                             |                  |                           |                  |
| <i>sir2</i>                     | YDL042C          | <i>sirt1 / Hssir2</i>  | NP_036370        | <i>nst1 / Ncsir2</i>     | NCU04737         | <i>sirA / Ansir2</i>        | AN10449          | <i>hstA / Aosir2</i>      | AO080506000102   |
| <i>hst1</i>                     | YOL068C          |                        |                  |                          |                  |                             |                  |                           |                  |
| <i>hst2</i>                     | YPL015C          | <i>sirt2 / Hshst2</i>  | NP_036369        | <i>nst2 / Nchst2</i>     | NCU00523         | <i>AN7461 / Anhst2</i>      | AN7461           | <i>hstB / Aohst2</i>      | AO080569000094   |
|                                 |                  | <i>sirt3 / Hshst2</i>  | NP_036371        |                          |                  | <i>AN11873 / Anhst2</i>     | AN11873          | <i>hstC / Aohst2</i>      | AO080508000293   |
| <i>hst3</i>                     | YOR025W          |                        |                  | <i>nst4 / Nchst3</i>     | NCU04859         |                             |                  |                           |                  |
| <i>hst4</i>                     | YDR191W          |                        |                  | <i>nst3 / Nchst4</i>     | NCU03059         | <i>AN1226 / Anhst4</i>      | AN1226           | <i>hstD / Aohst4</i>      | AB744041         |
|                                 |                  | <i>sirt4</i>           | NP_036372        | <i>nst5 / Ncsirt4</i>    | NCU00203         | <i>hstA / Ansirt4</i>       | AN11067          | <i>hstE / Aosirt4</i>     | AO080559000113   |
|                                 |                  | <i>sirt5</i>           | NP_036373        | <i>nst6 / Ncsirt5</i>    | NCU05973         | <i>AN1782 / Ansirt5</i>     | AN1782           | <i>hstF / Aosirt5</i>     | AO080568000195   |
|                                 |                  | <i>sirt6</i>           | NP_057623        | <i>nst7 / Ncsirt6</i>    | NCU07624         |                             |                  |                           |                  |
|                                 |                  | <i>sirt7</i>           | NP_057622        |                          |                  |                             |                  |                           |                  |

<sup>a</sup> HDAC names of *Saccharomyces cerevisiae* or *Homo Sapiens* with the species name indicated followed by a slash.

<sup>b</sup> Hda : Histone DeAcetylase

<sup>c</sup> Hst : Homolog of SirTuins



**Table S3. PCR primers used in this study**

| Primer name | Sequence(5' to 3') <sup>a,b</sup>                         | Region or purpose                 |
|-------------|-----------------------------------------------------------|-----------------------------------|
| adeA-F      | CCGTCATGTCCAGGAAGATAGGTCAG                                | <i>adeA</i> amplification         |
| adeA-R      | CTGCGCAACAGCATACGAGTCCACAG                                |                                   |
| hdaB-A      | CAATGGCATGACAAAGAACC                                      | 5' flanking region of <i>hdaB</i> |
| hdaB-B      | <u>CTGACCTATCTTCCTGGACATGACGGCTGTTCCCTGCAACATGAGATACA</u> |                                   |
| hdaB-C      | <u>CTGTGGACTCGTATGCTGTTGCGCAGAAGATCCGTGCGCAAGTT</u>       | 3'flanking region of <i>hdaB</i>  |
| hdaB-D      | CCATGGTGAATTAGGGCTCA                                      | fusion PCR for <i>hdaB</i>        |
| hdaB-A2     | CAATAGAATATTCCCCGCGT                                      |                                   |
| hdaB-D2     | CCCTTGGGATTAGAGTGCTT                                      |                                   |
| hdaB-F      | GTTGATCGGGATGTCAAAGG                                      |                                   |
| hdaB-G      | AATTCTCGGTTCTGCTGGTG                                      | <i>hdaB</i> ORF                   |
| hdaC-A      | TCTGTGCAAGCCTTATGTGC                                      | 5' flanking region of <i>hdaC</i> |
| hdaC-B      | CTGACCTATCTTCCTGGACATGACGGTCCGTCGAGGTTAGTGACAA            |                                   |
| hdaC-C      | <u>CTGTGGACTCGTATGCTGTTGCGCAGTCACTTTGACTACGGAGGGCT</u>    | 3'flanking region of <i>hdaC</i>  |
| hdaC-D      | GCCTCGAAATCATGGTCCTA                                      | <i>hdaC</i> ORF                   |
| hdaC-F      | TGAGTGCCTCGTAATGCTTG                                      |                                   |
| hdaC-G      | GTGGGCAGGTTGAAACTCTT                                      |                                   |
| hdaD-A      | TAACTGGCGCAGACCCATAA                                      |                                   |
| hdaD-B      | <u>CTGACCTATCTTCCTGGACATGACGGCCCTTCTTCTTTTCCTTATTGC</u>   | 5' flanking region of <i>hdaD</i> |
| hdaD-C      | <u>CTGTGGACTCGTATGCTGTTGCGCAGCTGTACGGTAAATGAAGGTCAGC</u>  | 3'flanking region of <i>hdaD</i>  |
| hdaD-D      | AAGGGGTCAGATCCACAATG                                      | fusion PCR for <i>hdaD</i>        |
| hdaD-A2     | CGCAGACCCATAAGAAGGAA                                      |                                   |
| hdaD-D2     | CTGTGTCCACAACCTGCCATT                                     |                                   |
| hdaD-F      | GTTGTTTGGTCAGCGTCAGA                                      |                                   |
| hdaD-G      | CCCAAAGGTGACAAGACGAT                                      | <i>hdaD</i> ORF                   |
| hdaA-A      | AACAAAGTGCCCTGTTGACC                                      | 5'flanking region of <i>hdaA</i>  |
| hdaA-B      | <u>CTGACCTATCTTCCTGGACATGACGGCATTGCTATGGCTAGCACCA</u>     |                                   |
| hdaA-C      | <u>CTGTGGACTCGTATGCTGTTGCGCAGTTTAGGACGTTTCAGATGGGG</u>    | 3'flanking region of <i>hdaA</i>  |
| hdaA-D      | TAGGTTTTCTGATGGCCCAG                                      | <i>hdaA</i> ORF                   |
| hdaA-F      | GTGATGCCTATTGCACAGGA                                      |                                   |
| hdaA-G      | GCTTTCGGGTACATGCAACT                                      |                                   |

|         |                                                           |                                   |
|---------|-----------------------------------------------------------|-----------------------------------|
| hdaE-A  | TCCGAAGTCCACTTTCTTGC                                      |                                   |
| hdaE-B  | <u>CTGACCTATCTTCCTGGACATGACGGCAAATAGTAGGTTTCATTTGGGGG</u> | 5' flanking region of <i>hdaE</i> |
| hdaE-C  | <u>CTGTGGACTCGTATGCTGTTGCGCAGAGTCTATCGGACTTTTGGTTCG</u>   |                                   |
| hdaE-D  | AGATCCGGAGTCGTTTCCTTT                                     | 3'flanking region of <i>hdaE</i>  |
| hdaE-A2 | AGTCTCTTTTCTTTGGCCGC                                      |                                   |
| hdaE-D2 | ATTGTTACGTTCTCCACCC                                       | fusion PCR for <i>hdaE</i>        |
| hdaE-F  | GGACCTTACGCATCCAAGT                                       |                                   |
| hdaE-G  | GATGCGTGTTGGACATTAGC                                      | <i>hdaE</i> ORF                   |
| hstA-A  | ATTACCTGGCGTTCTTGTGG                                      |                                   |
| hstA-B  | <u>CTGACCTATCTTCCTGGACATGACGGGGGTTCTTGTTTGGAGGGTT</u>     | 5'flanking region of <i>hstA</i>  |
| hstA-C  | <u>CTGTGGACTCGTATGCTGTTGCGCAGCGGATTCTTCAACGAAGAGC</u>     |                                   |
| hstA-D  | ACAGCTGCGAACTGATGATG                                      | 3'flanking region of <i>hstA</i>  |
| hstA-F  | GATTTCCGGCTCTTGTGTGT                                      |                                   |
| hstA-G  | GGTATTCCCGATTTTCGGTC                                      | <i>hstA</i> ORF                   |
| hstB-A  | CTTTGCTTTGAGTTCCTGCC                                      |                                   |
| hstB-B  | <u>CTGACCTATCTTCCTGGACATGACGGTCTAACCTGGCGGAGAGAAA</u>     | 5'flanking region of <i>hstB</i>  |
| hstB-C  | <u>CTGTGGACTCGTATGCTGTTGCGCAGTACCGCGAAAAGGAGAGAGA</u>     |                                   |
| hstB-D  | AACAGTCGGCGATGTATTCC                                      | 3'flanking region of <i>hstB</i>  |
| hstB-F  | CTTTTTCAGGGAGAATCCGC                                      |                                   |
| hstB-G  | CGCTCCATGTTAATGAGCAC                                      | <i>hstB</i> ORF                   |
| hstC-A  | AGTCATGGAAAAGACTGCGG                                      |                                   |
| hstC-B  | <u>CTGACCTATCTTCCTGGACATGACGGATTGGACTCAGCCTGATTGG</u>     | 5'flanking region of <i>hstC</i>  |
| hstC-C  | <u>CTGTGGACTCGTATGCTGTTGCGCAGAGTGCCCGAATAGGTTTCTG</u>     |                                   |
| hstC-D  | AGCCATCGCTGTCAGTTTCT                                      | 3'flanking region of <i>hstC</i>  |
| hstC-F  | GCCTTGCTGGCTAAGAAGAA                                      |                                   |
| hstC-G  | TCACACGACCCAAGGATACA                                      | <i>hstC</i> ORF                   |
| hstD-A  | TGCGGAAATGGGTTGTTT                                        |                                   |
| hstD-B  | <u>CTGACCTATCTTCCTGGACATGACGGATGGCACTTGTCGCATGTC</u>      | 5'flanking region of <i>hstD</i>  |
| hstD-C  | <u>CTGTGGACTCGTATGCTGTTGCGCAGGGCGTGGTGTAAATTCTTCGT</u>    |                                   |
| hstD-D  | TAACCGTGACATGACCCTTG                                      | 3'flanking region of <i>hstD</i>  |
| hstD-A2 | TGAAAGGATTACCTCCTCCC                                      |                                   |
| hstD-D2 | ACGTCCGGGATATTATGGGT                                      | fusion PCR for <i>hstD</i>        |
| hstD-F  | ACCATCAAGTCCCAGCAATC                                      |                                   |
| hstD-G  | AGACATCCATGCCTCCCTTA                                      | <i>hstD</i> ORF                   |

|               |                                                            |                                                                   |
|---------------|------------------------------------------------------------|-------------------------------------------------------------------|
| hstE-A        | TCCATCTGATAAGGTTCCGGC                                      |                                                                   |
| hstE-B        | <u>CTGACCTATCTTCCTGGACATGACGGAGATAATGGGTACGGCGAGA</u>      | 5'flanking region of <i>hstE</i>                                  |
| hstE-C        | <u>CTGTGGACTCGTATGCTGTTGCGCAGGGCGCTGTCCGAATGTATTA</u>      |                                                                   |
| hstE-D        | CCAGTGTACAATTCCGCCAT                                       | 3'flanking region of <i>hstE</i>                                  |
| hstE-A2       | ATAAGGTTCCGGCATGAGTGG                                      |                                                                   |
| hstE-D2       | GCCATGATACATCCAGCAGA                                       | fusion PCR for <i>hstE</i>                                        |
| hstE-F        | AATATCTGGGGCAGACGAGA                                       |                                                                   |
| hstE-G        | GGCACATTCTCAAGAGCACA                                       | <i>hstE</i> ORF                                                   |
| hstF-A        | ATTGACGAACCCTTGGACTG                                       |                                                                   |
| hstF-B        | <u>CTGACCTATCTTCCTGGACATGACGGGCGGGGTGTTGATAATGACT</u>      | 5'flanking region of <i>hstF</i>                                  |
| hstF-C        | <u>CTGTGGACTCGTATGCTGTTGCGCAGGGTATTATGGGGATTGTCGG</u>      |                                                                   |
| hstF-D        | TCTTCGTCTTCAAAGGCTCC                                       | 3'flanking region of <i>hstF</i>                                  |
| hstF-A2       | CGTCAGCTCACGGATTATGA                                       |                                                                   |
| hstF-D2       | TCTCGTTTGCCTTAGCTGTG                                       | fusion PCR for <i>hstF</i>                                        |
| hstF-F        | AGACATATGGCGCTGAAAGC                                       |                                                                   |
| hstF-G        | GCAATGTGGAAGGACATCAG                                       | <i>hstF</i> ORF                                                   |
| Fusion-hstD-F | tcgagctcggtaccCATGGTGC GGTCGCTGTCCGAAGAGG                  |                                                                   |
| Fusion-hstD-R | ctctagaggatccccTCATGCGGCCGGCTGATTTAACAAC                   | vector construction for <i>pUSHstD</i>                            |
| Fusion-laeA-F | tcgagctcggtaccCATGTTTGAAACGGCCAGACTGGAC                    |                                                                   |
| Fusion-laeA-R | ctctagaggatccccTCAGTTCGCAGGTTTCCGTGCTTGG                   | vector construction for <i>pUSlaeA</i>                            |
| laeA-A        | CCGGCTGTTCAAGATCCATGGATAG                                  |                                                                   |
| laeA(adeA)-B  | <u>CTGACCTATCTTCCTGGACATGACGGTTCGATGGCGACAGGCTGATG</u>     | 5'flanking region of <i>laeA</i>                                  |
| laeA(adeA)-C  | <u>CTGTGGACTCGTATGCTGTTGCGCAGAGAGCTCCATTACTGGGTATTCCGG</u> |                                                                   |
| laeA-D        | GAACCCGCCAACATCAAGCTTC                                     | 3'flanking region of <i>laeA</i>                                  |
| laeA-A2       | GGGATACCAACCACAACACCT                                      |                                                                   |
| laeA-D2       | TTACGTTTGGGAACGGAGTCA                                      | fusion PCR for <i>laeA</i>                                        |
| laeA-F        | CAGCCCTCAAACCACCCAAA                                       |                                                                   |
| laeA-G        | TTGAACGCCTCCGACTTGAC                                       | <i>laeA</i> ORF                                                   |
| laeA(sC)-B    | <u>GAACGAGACGAACGAGGAGCCATATTCGATGGCGACAGGCTGATG</u>       |                                                                   |
| laeA(sC)-C    | <u>CATACGGGCAGCTATTGCCAAGAGAAGAGCTCCATTACTGGGTATTCCGG</u>  | disruption cassette for <i>laeA</i> in<br><i>ΔhstD</i> background |
| sC-F          | ATATGGCTCCTCGTTCGTCTCGTTC                                  |                                                                   |
| sC-R          | TCTCTTGGCAATAGCTGCCCGTATG                                  | sC amplification                                                  |

|                  |                                                           |                                                                |
|------------------|-----------------------------------------------------------|----------------------------------------------------------------|
| P-amyB-F         | GGCAACTCGCTTACCGATTAC                                     | confirmation of transformation<br>of over expression construct |
| hstD-comp-B      | <u>GAACGAGACGAACGAGGAGCCATATTAACCGTGACATGACCCTTG</u>      |                                                                |
| adeA fusion sC-F | <u>CATACGGGCAGCTATTGCCAAGAGACCGTCATGTCCAGGAAGATAGGTCA</u> | Complementation of <i>hstD</i>                                 |
| nested adeA-R    | GCCTTGGTCTGGGAGTGT                                        |                                                                |
| kojA-F           | GGTTTCCAGGGCCTCATCAG                                      |                                                                |
| kojA-R           | GAGAAATCCGGGCCAGAACC                                      | probe for <i>kojA</i>                                          |
| kojR-F           | CGGCCAGCTATGACCCCAT                                       |                                                                |
| kojR-R           | GGCGTCATGGGAGAGTGTGA                                      | probe for <i>kojR</i>                                          |
| kojT-F           | CGAGGTGTCTCTTGCAAACC                                      |                                                                |
| kojT-R           | GTTCTGGGATAGGCGAACCA                                      | probe for <i>kojT</i>                                          |
| ipnA-F           | CACCTACTCACGAGGTCAAC                                      |                                                                |
| ipnA-R           | GTTGACCTCGTGAGTAGGTG                                      | probe for <i>ipnA</i>                                          |
| laeA-F           | AGCCCTCAAACCACCCAAAG                                      |                                                                |
| laeA-R           | TTGAACGCCTCCGACTTGAC                                      | probe for <i>laeA</i>                                          |

<sup>a</sup> Additional nucleotides for fusion PCR are indicated by underlines

<sup>b</sup> Additional nucleotides for In-Fusion reaction are indicated in small letters

**Table S4. Significantly changed genes in *AhstD***

| Gene ID        | Description                                                                                       | Fold change<br>( <i>AhstD</i> / Control) | FunCat categorization <sup>a,b</sup> |                                                |
|----------------|---------------------------------------------------------------------------------------------------|------------------------------------------|--------------------------------------|------------------------------------------------|
|                |                                                                                                   |                                          | level 1                              | level 2                                        |
| AO080553000121 | KojT, putative transporter; present in the kojic acid biosynthetic gene cluster                   | 105.5                                    | [20][32]                             | [20.01][20.03][20.09][32.05][32.07]            |
| AO080550000061 | Hydroxyindole-O-methyltransferase and related SAM-dependent methyltransferases                    | 102.5                                    | [01]                                 | [01.05][01.20]                                 |
| AO080501000196 | fleA fucose-specific lectin                                                                       | 61.82                                    | #                                    | #                                              |
| AO080563000007 | CpaD, O-dimethylallyltransferase (DMAT); dimethylallylates cAATrp to form beta-cyclopiazonic acid | 49.39                                    | #                                    | #                                              |
| AO080554000441 | Uncharacterized membrane protein, predicted efflux pump                                           | 38.39                                    | [20][32]                             | [20.01][32.07]                                 |
| AO080563000004 | Predicted protein                                                                                 | 32.27                                    | [20][32][34]                         | [20.01][20.03][20.09][32.05][32.07]<br>[34.11] |
| AO080525000393 | Predicted protein                                                                                 | 29.96                                    | [01][11]                             | [01.02][11.02]                                 |
| AO080563000005 | Cytochrome P450 CYP3 CYP5 CYP6 CYP9 subfamilies                                                   | 27.59                                    | [01]                                 | [01.06][01.20]                                 |
| AO080563000006 | Predicted protein                                                                                 | 25.97                                    | #                                    | #                                              |
| AO080508000254 | Predicted protein                                                                                 | 24.93                                    | [01]                                 | [01.05]                                        |
| AO080511000457 | Predicted protein                                                                                 | 21.4                                     | #                                    | #                                              |
| AO080522000026 | Catalase (peroxidase I)                                                                           | 20.19                                    | [32]                                 | [32.07]                                        |
| AO080536000097 | Predicted protein                                                                                 | 19.6                                     | #                                    | #                                              |
| AO080542000015 | Predicted protein                                                                                 | 19.4                                     | [32]                                 | [32.05]                                        |
| AO080515000039 | Predicted protein                                                                                 | 17.93                                    | #                                    | #                                              |
| AO080550000056 | Proteins containing the FAD binding domain                                                        | 14.42                                    | [01]                                 | [01.05][01.20]                                 |
| AO080508000512 | mleA lectin                                                                                       | 12.87                                    | #                                    | #                                              |
| AO080515000015 | Uncharacterized protein, possibly involved in utilization of glycolate and propanediol            | 12.31                                    | #                                    | #                                              |
| AO080513000111 | Predicted protein                                                                                 | 11.85                                    | #                                    | #                                              |
| AO080529000071 | Predicted protein                                                                                 | 10.43                                    | #                                    | #                                              |
| AO080508000290 | Predicted protein                                                                                 | 10.11                                    | #                                    | #                                              |
| AO080523000388 | Predicted protein                                                                                 | 9.984                                    | #                                    | #                                              |
| AO080554000006 | Predicted protein                                                                                 | 9.951                                    | #                                    | #                                              |
| AO080550000062 | Dehydrogenases (flavoproteins)                                                                    | 9.86                                     | #                                    | #                                              |
| AO080525000250 | Predicted protein                                                                                 | 9.747                                    | #                                    | #                                              |
| AO080553000119 | KojA, FAD-dependent oxidoreductase; present in the kojic acid biosynthetic gene cluster           | 9.711                                    | #                                    | #                                              |
| AO080541000467 | Predicted protein                                                                                 | 9.668                                    | #                                    | #                                              |
| AO080550000076 | Predicted protein                                                                                 | 9.323                                    | #                                    | #                                              |
| AO080539000068 | Predicted protein                                                                                 | 9.028                                    | #                                    | #                                              |
| AO080510000132 | Predicted protein                                                                                 | 8.772                                    | #                                    | #                                              |
| AO080529000068 | Predicted protein                                                                                 | 8.053                                    | #                                    | #                                              |
| AO080554000051 | Predicted protein                                                                                 | 7.73                                     | #                                    | #                                              |
| AO080550000193 | RNA 3'-terminal phosphate cyclase                                                                 | 7.67                                     | #                                    | #                                              |
| AO080551000140 | Polyketide synthase modules and related proteins                                                  | 7.028                                    | [01][32]                             | [01.20][32.05]                                 |
| AO080511000259 | Predicted protein                                                                                 | 6.937                                    | #                                    | #                                              |
| AO080523000239 | TPR repeat                                                                                        | 6.617                                    | #                                    | #                                              |
| AO080537000053 | Predicted hydrolases or acyltransferases (alpha beta hydrolase superfamily)                       | 6.315                                    | #                                    | #                                              |
| AO080527000194 | Predicted xylanase chitin deacetylase                                                             | 6.251                                    | [01][16]                             | [01.05][01.25][16.05]                          |
| AO080551000190 | Beta-lactamase class C and other penicillin binding proteins                                      | 6.175                                    | #                                    | #                                              |
| AO080508000358 | Predicted protein                                                                                 | 5.923                                    | #                                    | #                                              |
| AO080515000064 | Multicopper oxidases                                                                              | 5.855                                    | [01][32]                             | [01.05][01.07][01.25][32.07]                   |
| AO080527000284 | Predicted protein                                                                                 | 5.77                                     | #                                    | #                                              |

|                                                                                                             |       |                  |                                                   |
|-------------------------------------------------------------------------------------------------------------|-------|------------------|---------------------------------------------------|
| AO080549000421 Predicted protein                                                                            | 5.727 | #                | #                                                 |
| AO080550000107 Predicted protein                                                                            | 5.723 | #                | #                                                 |
| AO080523000444 Predicted protein                                                                            | 5.71  | #                | #                                                 |
| AO080567000074 Predicted protein                                                                            | 5.689 | #                | #                                                 |
| AO080541000077 Predicted protein                                                                            | 5.673 | #                | #                                                 |
| AO080523000389 Cytochrome P450 CYP4 CYP19 CYP26 subfamilies                                                 | 5.589 | [32]             | [32.07]                                           |
| AO080521000213 Predicted protein                                                                            | 5.575 | #                | #                                                 |
| AO080547000015 Predicted protein                                                                            | 5.394 | #                | #                                                 |
| AO080523000405 Predicted protein                                                                            | 5.171 | [32][42]         | [32.01][42.01][42.04]                             |
| AO080527000412 Predicted protein                                                                            | 5.107 | #                | #                                                 |
| AO080525000701 Alkaline phosphatase                                                                         | 5.07  | [01]             | [01.04][01.06][01.07]                             |
| AO080523000550 Predicted protein                                                                            | 4.932 | #                | #                                                 |
| AO080562000080 aflJ Predicted protein                                                                       | 4.922 | #                | #                                                 |
| AO080554000398 Predicted protein                                                                            | 4.746 | #                | #                                                 |
| AO080525000625 Predicted protein                                                                            | 4.693 | #                | #                                                 |
| AO080541000440 Predicted protein                                                                            | 4.676 | #                | #                                                 |
| AO080530000095 Predicted protein                                                                            | 4.602 | #                | #                                                 |
| AO080554000103 Cytochrome P450 CYP3 CYP5 CYP6 CYP9 subfamilies                                              | 4.597 | [01][20][32]     | [01.01][01.02][01.06][01.20][20.01][32.07]        |
| AO080547000014 Ankyrin                                                                                      | 4.512 | #                | #                                                 |
| AO080549000406 Predicted dehydrogenases and related proteins                                                | 4.472 | [01][11]         | [01.05][11.02]                                    |
| AO080508000357 Chitin synthase hyaluronan synthase (glycosyltransferases)                                   | 4.45  | #                | #                                                 |
| AO080523000006 Predicted protein                                                                            | 4.401 | #                | #                                                 |
| AO080525000059 Cytochrome P450 CYP2 subfamily                                                               | 4.37  | [01][16][20][32] | [01.06][01.07][01.20][16.17][16.21][20.01][32.07] |
| AO080523000500 Predicted protein                                                                            | 4.32  | #                | #                                                 |
| AO080527000186 Oxidosqualene-lanosterol cyclase and related proteins                                        | 4.272 | [01]             | [01.06][01.20]                                    |
| AO080523000718 Carboxylesterase type B                                                                      | 4.266 | #                | #                                                 |
| AO080529000067 Cytochrome P450 CYP11 CYP12 CYP24 CYP27 subfamilies                                          | 4.247 | [01][32]         | [01.01][01.20][32.07]                             |
| AO080515000065 Predicted protein                                                                            | 4.223 | #                | #                                                 |
| AO080532000090 Predicted protein                                                                            | 4.183 | #                | #                                                 |
| AO080508000361 Predicted protein                                                                            | 4.159 | #                | #                                                 |
| AO080551000170 Predicted protein                                                                            | 4.114 | [01][16]         | [01.01][01.20][16.17]                             |
| AO080525000706 Predicted protein                                                                            | 4.098 | #                | #                                                 |
| AO080532000546 Cytochrome P450 CYP2 subfamily                                                               | 4.046 | [01][16][20]     | [01.20][16.17][16.21][20.01]                      |
| AO080508000305 Vesicular amine transporter                                                                  | 4.008 | #                | #                                                 |
| AO080527000377 Glucose dehydrogenase choline dehydrogenase mandelonitrile lyase (GMC oxidoreductase family) | 4.008 | [01][16][20]     | [01.01][01.05][01.20][16.21][20.01]               |
| AO080531000104 Predicted protein                                                                            | 3.951 | #                | #                                                 |
| AO080525000269 Predicted protein                                                                            | 3.848 | #                | #                                                 |
| AO080557000082 Cofilin; actin depolymerisation factor                                                       | 3.847 | #                | #                                                 |
| AO080532000337 Chaperone-dependent E3 ubiquitin protein ligase (contains TPR repeats)                       | 3.838 | #                | #                                                 |
| AO080523000512 Predicted protein                                                                            | 3.774 | #                | #                                                 |
| AO080523000573 Predicted protein                                                                            | 3.77  | #                | #                                                 |
| AO080536000086 ATPases of the AAA <sup>+</sup> class                                                        | 3.719 | #                | #                                                 |
| AO080515000151 Predicted protein                                                                            | 3.707 | [43]             | [43.01]                                           |
| AO080525000687 Predicted transporter (major facilitator superfamily)                                        | 3.648 | #                | #                                                 |
| AO080557000045 Predicted protein                                                                            | 3.624 | [32]             | [32.05]                                           |

|                                                                                                                              |       |                  |                                                          |
|------------------------------------------------------------------------------------------------------------------------------|-------|------------------|----------------------------------------------------------|
| AO080515000071 Predicted protein                                                                                             | 3.604 | #                | #                                                        |
| AO080501000080 Predicted protein                                                                                             | 3.559 | #                | #                                                        |
| AO080566000093 Ankyrin                                                                                                       | 3.555 | #                | #                                                        |
| AO080525000026 SAM-dependent methyltransferases                                                                              | 3.536 | #                | #                                                        |
| AO080515000098 Predicted protein                                                                                             | 3.503 | #                | #                                                        |
| AO080554000362 Predicted protein                                                                                             | 3.493 | #                | #                                                        |
| AO080503000171 Phosphoenolpyruvate carboxykinase (ATP)                                                                       | 3.468 | [01][02]         | [01.04][01.05][02.01]                                    |
| AO080523000572 Predicted protein                                                                                             | 3.423 | #                | #                                                        |
| AO080533000376 Multidrug resistance-associated protein mitoxantrone resistance protein, ABC superfamily                      | 3.391 | [01][16][20][32] | [01.04][16.19][20.03][32.07]                             |
| AO080508000531 Predicted protein                                                                                             | 3.39  | #                | #                                                        |
| AO080549000304 Carboxylesterase type B                                                                                       | 3.38  | [01]             | [01.06]                                                  |
| AO080506000286 Predicted protein                                                                                             | 3.315 | #                | #                                                        |
| AO080523000216 Predicted protein                                                                                             | 3.303 | #                | #                                                        |
| AO080538000066 Acyl-CoA synthetase                                                                                           | 3.298 | [01]             | [01.01][01.05][01.20]                                    |
| AO080523000032 Amino acid transporters                                                                                       | 3.296 | [01][20][32][34] | [01.06][20.01][20.03][20.09][32.01][34.01][34.11]        |
| AO080510000108 ATPases of the AAA <sup>+</sup> class                                                                         | 3.199 | #                | #                                                        |
| AO080513000093 Jacalin-like lectin domain-containing protein                                                                 | 3.158 | #                | #                                                        |
| AO080525000640 Predicted protein                                                                                             | 3.156 | #                | #                                                        |
| AO080527000200 Chitinase                                                                                                     | 3.085 | [01]             | [01.05][01.25]                                           |
| AO080553000120 KojR, Zn(II)2Cys6 transcription factor; induced by kojic acid; present in the kojic acid biosynthetic gene cl | 3.083 | [11][34]         | [11.02][34.11]                                           |
| AO080525000062 Acetylcholinesterase Butyrylcholinesterase                                                                    | 3.076 | [01][32]         | [01.05][01.06][01.20][01.25][32.05][32.07][32.10]        |
| AO080541000359 Integral membrane ankyrin-repeat protein Kidins220 (protein kinase D substrate)                               | 3.076 | #                | #                                                        |
| AO080541000097 Predicted transporter (major facilitator superfamily)                                                         | 3.063 | [20][32]         | [20.01][32.07]                                           |
| AO080546000223 Predicted protein                                                                                             | 3.039 | #                | #                                                        |
| AO080542000014 Cytochrome P450 CYP4 CYP19 CYP26 subfamilies                                                                  | 3.037 | [01][32]         | [01.01][32.05][32.07]                                    |
| AO080539000029 Predicted protein                                                                                             | 3.016 | [11]             | [11.02]                                                  |
| AO080547000070 Predicted protein                                                                                             | 2.985 | #                | #                                                        |
| AO080523000242 Predicted protein                                                                                             | 2.977 | #                | #                                                        |
| AO080502000014 Uncharacterized conserved protein                                                                             | 2.976 | #                | #                                                        |
| AO080503000338 NAD <sup>+</sup> ADP-ribosyltransferase Parp, required for poly-ADP ribosylation of nuclear proteins          | 2.959 | [01][10][14][16] | [01.05][10.01][14.07][16.01][16.03]                      |
| AO080506000124 Predicted protein                                                                                             | 2.951 | #                | #                                                        |
| AO080542000029 Conserved protein domain typically associated with flavoprotein oxygenases, DIM6 NTAB family                  | 2.943 | #                | #                                                        |
| AO080521000317 Predicted protein                                                                                             | 2.904 | #                | #                                                        |
| AO080536000058 Predicted protein                                                                                             | 2.901 | #                | #                                                        |
| AO080518000104 Predicted protein                                                                                             | 2.888 | #                | #                                                        |
| AO080551000149 Predicted protein                                                                                             | 2.88  | #                | #                                                        |
| AO080550000101 Predicted protein                                                                                             | 2.853 | #                | #                                                        |
| AO080501000088 3-polyprenyl-4-hydroxybenzoate decarboxylase and related decarboxylases                                       | 2.843 | #                | #                                                        |
| AO080509000188 Predicted aminoglycoside phosphotransferase                                                                   | 2.835 | #                | #                                                        |
| AO080554000077 Monodehydroascorbate ferredoxin reductase                                                                     | 2.835 | [02]             | [02.11]                                                  |
| AO080536000060 Predicted protein                                                                                             | 2.826 | #                | #                                                        |
| AO080506000051 Predicted short chain-type dehydrogenase                                                                      | 2.821 | [01][32]         | [01.05][01.20][32.05]                                    |
| AO080549000353 ATP adenyltransferase (5',5'-P-1, P-4-tetraphosphate phosphorylase II)                                        | 2.812 | [01][11][16][20] | [01.04][01.06][11.04][16.17][16.19][20.01][20.03][20.09] |

|                                                                                                                       |       |                  |                                            |
|-----------------------------------------------------------------------------------------------------------------------|-------|------------------|--------------------------------------------|
| AO080523000207 Predicted protein                                                                                      | 2.766 | #                | #                                          |
| AO080536000143 Tellurite resistance protein and related permeases                                                     | 2.743 | #                | #                                          |
| AO080505000118 Predicted protein                                                                                      | 2.726 | #                | #                                          |
| AO080546000372 Ornithine aminotransferase                                                                             | 2.705 | [01][16]         | [01.01][01.02][01.20][16.21]               |
| AO080505000202 Methionyl-tRNA formyltransferase                                                                       | 2.701 | #                | #                                          |
| AO080522000033 Predicted protein                                                                                      | 2.694 | #                | #                                          |
| AO080509000132 Predicted protein                                                                                      | 2.686 | #                | #                                          |
| AO080546000363 Predicted protein                                                                                      | 2.676 | #                | #                                          |
| AO080534000002 Non-ribosomal peptide synthetase modules and related proteins                                          | 2.663 | #                | #                                          |
| AO080561000015 Predicted protein                                                                                      | 2.659 | #                | #                                          |
| AO080532000416 Threonine dehydrogenase and related Zn-dependent dehydrogenases                                        | 2.657 | [01][02][16]     | [01.01][01.05][02.16][16.17]               |
| AO080515000061 Uncharacterized conserved protein                                                                      | 2.644 | #                | #                                          |
| AO080503000025 Predicted protein                                                                                      | 2.631 | #                | #                                          |
| AO080525000209 Dihydrolipoamide succinyltransferase (2-oxoglutarate dehydrogenase, E2 subunit)                        | 2.617 | #                | #                                          |
| AO080541000475 Glutathione S-transferase                                                                              | 2.593 | [32][40]         | [32.01][32.07][40.10]                      |
| AO080512000001 Transposon-encoded proteins with TYA, reverse transcriptase, integrase domains in various combinations | 2.561 | #                | #                                          |
| AO080523000247 Predicted acyl-CoA transferases carnitine dehydratase                                                  | 2.553 | #                | #                                          |
| AO080508000270 RNA polymerase II transcription termination factor TTF2 Iodestar, DEAD-box superfamily                 | 2.541 | #                | #                                          |
| AO080523000391 Cytochrome P450 CYP3 CYP5 CYP6 CYP9 subfamilies                                                        | 2.519 | [16][32]         | [16.21][32.05][32.07]                      |
| AO080527000504 Predicted protein                                                                                      | 2.503 | #                | #                                          |
| AO080525000318 Predicted protein                                                                                      | 2.501 | #                | #                                          |
| AO080566000091 Predicted protein                                                                                      | 2.493 | #                | #                                          |
| AO080503000216 Predicted protein                                                                                      | 2.492 | #                | #                                          |
| AO080523000079 Beta-lactamase class C and other penicillin binding proteins                                           | 2.491 | #                | #                                          |
| AO080532000061 Uncharacterized conserved protein                                                                      | 2.483 | [20]             | [20.01][20.03][20.09]                      |
| AO080505000203 Nucleoside-diphosphate-sugar epimerases                                                                | 2.467 | [01][11][42]     | [01.05][11.02][42.10]                      |
| AO080513000020 Predicted protein                                                                                      | 2.459 | #                | #                                          |
| AO080505000159 Alcohol dehydrogenase, class V                                                                         | 2.446 | [01][02][16][42] | [01.05][01.20][02.01][02.16][16.17][42.01] |
| AO080546000050 Protein tyrosine serine phosphatase                                                                    | 2.442 | [14]             | [14.07]                                    |
| AO080531000027 Dimethylglycine dehydrogenase precursor                                                                | 2.426 | [01][16][20]     | [01.01][01.02][01.05][16.21][20.01]        |
| AO080501000014 wykB, FAD-dependent oxidoreductase                                                                     | 2.412 | [14]             | [14.07]                                    |
| AO080567000034 Predicted protein                                                                                      | 2.409 | #                | #                                          |
| AO080536000139 7-keto-8-aminopelargonate synthetase and related enzymes                                               | 2.406 | #                | #                                          |
| AO080523000390 Cytochrome P450 CYP4 CYP19 CYP26 subfamilies                                                           | 2.401 | [01]             | [01.01]                                    |
| AO080563000003 Synaptic vesicle transporter SVOP and related transporters (major facilitator superfamily)             | 2.394 | [20][32][34]     | [20.01][20.03][20.09][32.05][32.07][34.11] |
| AO080520000010 Reverse transcriptase                                                                                  | 2.393 | #                | #                                          |
| AO080527000001 Predicted protein                                                                                      | 2.392 | #                | #                                          |
| AO080546000314 Predicted protein                                                                                      | 2.368 | #                | #                                          |
| AO080537000005 Predicted flavin-nucleotide-binding protein structurally related to pyridoxine 5 -phosphate oxidase    | 2.363 | #                | #                                          |
| AO080568000203 Predicted protein                                                                                      | 2.359 | #                | #                                          |
| AO080521000212 Predicted protein                                                                                      | 2.35  | #                | #                                          |
| AO080515000262 ATP-dependent RNA helicase                                                                             | 2.337 | #                | #                                          |
| AO080506000125 ADP-ribose pyrophosphatase                                                                             | 2.331 | [01][16][32]     | [01.03][16.17][32.01]                      |
| AO080548000022 Zn-finger                                                                                              | 2.326 | #                | #                                          |
| AO080533000254 Inositol monophosphatase                                                                               | 2.32  | [01][30]         | [01.04][01.05][01.06][01.20][30.01]        |



|                                                                                                                       |       |              |                                            |
|-----------------------------------------------------------------------------------------------------------------------|-------|--------------|--------------------------------------------|
| AO080554000301 Predicted protein                                                                                      | 2.319 | #            | #                                          |
| AO080509000068 Predicted protein                                                                                      | 2.315 | #            | #                                          |
| AO080521000046 Putative dehydrogenase domain of multifunctional non-ribosomal peptide synthetases and related enzymes | 2.299 | [01][20][34] | [01.20][20.01][34.01]                      |
| AO080561000093 Predicted protein                                                                                      | 2.298 | #            | #                                          |
| AO080503000246 Predicted transporter (major facilitator superfamily)                                                  | 2.293 | [01][20][34] | [01.05][20.01][20.03][20.09][34.01][34.11] |
| AO080523000538 Predicted glutamine synthetase                                                                         | 2.287 | #            | #                                          |
| AO080528000042 Permease of the major facilitator superfamily                                                          | 2.284 | [20]         | [20.01][20.03][20.09]                      |
| AO080523000723 Acetyltransferases, including N-acetylases of ribosomal proteins                                       | 2.282 | #            | #                                          |
| AO080570000066 Permease of the major facilitator superfamily                                                          | 2.263 | [20]         | [20.01][20.03][20.09]                      |
| AO080569000133 Predicted protein                                                                                      | 2.255 | [10][11][42] | [10.03][11.04][11.06][42.16]               |
| AO080523000499 Predicted protein                                                                                      | 2.238 | #            | #                                          |
| AO080527000070 Lactoylglutathione lyase and related lyases                                                            | 2.231 | #            | #                                          |
| AO080553000127 Predicted protein                                                                                      | 2.231 | #            | #                                          |
| AO080567000088 Predicted protein                                                                                      | 2.219 | #            | #                                          |
| AO080551000005 Spt6 ortholog, DNA-binding subunit of a DNA-dependent protein kinase (Ku70 autoantigen)                | 2.214 | [10][11]     | [10.01][11.02]                             |
| AO080515000013 Predicted protein                                                                                      | 2.212 | #            | #                                          |
| AO080537000052 Predicted protein                                                                                      | 2.212 | #            | #                                          |
| AO080550000146 Exopolyphosphatase                                                                                     | 2.207 | [01][11][30] | [01.05][11.02][30.01]                      |
| AO080527000050 Predicted protein                                                                                      | 2.19  | #            | #                                          |
| AO080511000186 Predicted protein                                                                                      | 2.175 | #            | #                                          |
| AO080509000038 Predicted protein                                                                                      | 2.172 | [43]         | [43.01]                                    |
| AO080515000014 Predicted protein                                                                                      | 2.168 | #            | #                                          |
| AO080532000091 Cysteine desulfurase NFS1                                                                              | 2.162 | [01]         | [01.20]                                    |
| AO080511000049 Predicted protein                                                                                      | 2.161 | #            | #                                          |
| AO080511000294 Predicted protein                                                                                      | 2.16  | #            | #                                          |
| AO080523000130 Predicted protein                                                                                      | 2.157 | #            | #                                          |
| AO080536000059 Predicted protein                                                                                      | 2.152 | #            | #                                          |
| AO080508000090 Predicted protein                                                                                      | 2.151 | #            | #                                          |
| AO080527000162 Predicted protein                                                                                      | 2.147 | [30][34][43] | [30.01][34.11][43.01]                      |
| AO080501000155 Predicted transporter (major facilitator superfamily)                                                  | 2.145 | [01][20]     | [01.05][20.01][20.03][20.09]               |
| AO080505000279 Predicted protein                                                                                      | 2.142 | #            | #                                          |
| AO080508000097 3-deoxy-D-arabino-heptulosonate 7-phosphate (DAHP) synthase                                            | 2.139 | [01]         | [01.01][01.05][01.20]                      |
| AO080523000024 Glycerol uptake facilitator and related permeases (Major Intrinsic Protein Family)                     | 2.129 | #            | #                                          |
| AO080501000008 wykN, Non-ribosomal peptide synthetase modules and related proteins                                    | 2.117 | #            | #                                          |
| AO080539000074 Predicted protein                                                                                      | 2.097 | #            | #                                          |
| AO080518000037 Predicted transporter (major facilitator superfamily)                                                  | 2.073 | [20][32]     | [20.01][20.03][20.09][32.05][32.07]        |
| AO080541000154 Carboxypeptidase C (cathepsin A)                                                                       | 2.062 | [14]         | [14.13]                                    |
| AO080567000053 Predicted protein                                                                                      | 2.062 | #            | #                                          |
| AO080550000102 Predicted acyl esterases                                                                               | 2.055 | #            | #                                          |
| AO080505000097 Transthyretin and related proteins                                                                     | 2.053 | [01]         | [01.02][01.03]                             |
| AO080546000347 Catalase (peroxidase I)                                                                                | 2.051 | [20][32][42] | [20.01][32.01][32.07][42.16]               |
| AO080533000188 Predicted protein                                                                                      | 2.046 | #            | #                                          |
| AO080551000123 Predicted protein                                                                                      | 2.039 | #            | #                                          |
| AO080562000073 Predicted protein                                                                                      | 2.036 | #            | #                                          |
| AO080551000142 Predicted protein                                                                                      | 2.034 | #            | #                                          |
| AO080532000609 Predicted protein                                                                                      | 2.032 | #            | #                                          |

|                                                                                                            |       |                                          |                                                                                                                                       |
|------------------------------------------------------------------------------------------------------------|-------|------------------------------------------|---------------------------------------------------------------------------------------------------------------------------------------|
| AO080527000203 Isocitrate isopropylmalate dehydrogenase                                                    | 2.021 | [01][02][16][20]                         | [01.01][01.05][02.01][02.10][16.21][20.01]                                                                                            |
| AO080525000648 Predicted protein                                                                           | 2.02  | #                                        | #                                                                                                                                     |
| AO080571000012 Molecular chaperone (DnaJ superfamily)                                                      | 2.014 | #                                        | #                                                                                                                                     |
| AO080523000419 Predicted protein                                                                           | 2.007 | #                                        | #                                                                                                                                     |
| AO080531000318 2-polyprenyl-6-methoxyphenol hydroxylase and related FAD-dependent oxidoreductases          | 2.004 | [01]                                     | [01.05][01.20]                                                                                                                        |
| AO080504000029 Phospholipase C                                                                             | 2.002 | #                                        | #                                                                                                                                     |
| AO080533000108 Protein kinase PCTAIRE and related kinases                                                  | 2.001 | [01][02][10][11][14][16][18][30][34][40] | [01.04][01.05][02.19][10.01][10.03][11.02][14.07][16.01][16.03][16.19][18.01][18.02][30.01][30.05][34.05][34.11][40.01][42.10][43.01] |
| AO080505000181 Glycosyltransferase                                                                         | 0.498 | [01][02][32][34][43]                     | [01.05][02.19][32.01][34.11][43.01]                                                                                                   |
| AO080503000128 Predicted protein                                                                           | 0.496 | #                                        | #                                                                                                                                     |
| AO080521000172 Predicted membrane protein                                                                  | 0.496 | #                                        | #                                                                                                                                     |
| AO080514000015 Transcription factor PRD and related proteins, contain PAX and HOX domains                  | 0.495 | #                                        | #                                                                                                                                     |
| AO080531000179 Predicted protein                                                                           | 0.494 | #                                        | #                                                                                                                                     |
| AO080503000252 Predicted protein                                                                           | 0.492 | #                                        | #                                                                                                                                     |
| AO080546000219 Predicted protein                                                                           | 0.492 | #                                        | #                                                                                                                                     |
| AO080560000080 Predicted protein                                                                           | 0.492 | #                                        | #                                                                                                                                     |
| AO080513000270 Predicted protein                                                                           | 0.491 | #                                        | #                                                                                                                                     |
| AO080508000004 Predicted protein                                                                           | 0.487 | #                                        | #                                                                                                                                     |
| AO080503000123 Predicted protein                                                                           | 0.486 | #                                        | #                                                                                                                                     |
| AO080513000060 Alpha-amylase                                                                               | 0.485 | [01]                                     | [01.05]                                                                                                                               |
| AO080532000307 Predicted protein                                                                           | 0.481 | #                                        | #                                                                                                                                     |
| AO080554000482 NADPH:quinone reductase and related Zn-dependent oxidoreductases                            | 0.481 | [01][16]                                 | [01.05][01.20][16.17]                                                                                                                 |
| AO080523000408 Dehydrogenases with different specificities (related to short-chain alcohol dehydrogenases) | 0.48  | #                                        | #                                                                                                                                     |
| AO080550000156 Predicted protein                                                                           | 0.479 | #                                        | #                                                                                                                                     |
| AO080513000204 Predicted protein                                                                           | 0.478 | #                                        | #                                                                                                                                     |
| AO080560000087 Predicted protein                                                                           | 0.478 | #                                        | #                                                                                                                                     |
| AO080505000104 Predicted protein                                                                           | 0.476 | #                                        | #                                                                                                                                     |
| AO080568000096 Cytochrome P450 CYP4 CYP19 CYP26 subfamilies                                                | 0.474 | [01][02]                                 | [01.06][01.20][02.45]                                                                                                                 |
| AO080523000182 Acetylcholinesterase Butyrylcholinesterase                                                  | 0.47  | #                                        | #                                                                                                                                     |
| AO080532000189 Predicted protein                                                                           | 0.469 | [11][14]                                 | [11.06][14.07][14.13]                                                                                                                 |
| AO080570000072 Cytochrome P450 CYP4 CYP19 CYP26 subfamilies                                                | 0.469 | [01][32]                                 | [01.01][32.05][32.07]                                                                                                                 |
| AO080561000074 Endopolygalacturonase                                                                       | 0.468 | #                                        | #                                                                                                                                     |
| AO080511000067 Predicted protein                                                                           | 0.466 | #                                        | #                                                                                                                                     |
| AO080533000118 Predicted protein                                                                           | 0.464 | #                                        | #                                                                                                                                     |
| AO080508000310 Ketopantoate hydroxymethyltransferase                                                       | 0.463 | [01][42]                                 | [01.07][42.01]                                                                                                                        |
| AO080523000640 Sorbin and SH3 domain-containing protein                                                    | 0.463 | [10]                                     | [10.03]                                                                                                                               |
| AO080536000108 Predicted protein                                                                           | 0.459 | #                                        | #                                                                                                                                     |
| AO080508000430 Predicted protein                                                                           | 0.457 | #                                        | #                                                                                                                                     |
| AO080521000200 Predicted protein                                                                           | 0.456 | [20][34]                                 | [20.01][34.11]                                                                                                                        |
| AO080522000004 Cytochrome P450                                                                             | 0.456 | #                                        | #                                                                                                                                     |
| AO080506000272 Predicted protein                                                                           | 0.455 | #                                        | #                                                                                                                                     |
| AO080557000027 Predicted protein                                                                           | 0.455 | #                                        | #                                                                                                                                     |
| AO080555000231 Predicted protein                                                                           | 0.454 | #                                        | #                                                                                                                                     |
| AO080523000128 Predicted protein                                                                           | 0.453 | #                                        | #                                                                                                                                     |

|                                                                                       |       |                  |                                                |
|---------------------------------------------------------------------------------------|-------|------------------|------------------------------------------------|
| AO080533000173 Predicted protein                                                      | 0.453 | #                | #                                              |
| AO080508000082 Predicted protein                                                      | 0.451 | #                | #                                              |
| AO080515000125 Permeases of the major facilitator superfamily                         | 0.449 | [20]             | [20.01][20.03][20.09]                          |
| AO080542000184 Cytochrome P450 CYP4 CYP19 CYP26 subfamilies                           | 0.448 | #                | #                                              |
| AO080533000250 Predicted protein                                                      | 0.447 | #                | #                                              |
| AO080549000362 Endonuclease III                                                       | 0.447 | [01][10][16][32] | [01.03][10.01][16.03][16.17][16.21]<br>[32.01] |
| AO080523000306 Predicted protein                                                      | 0.442 | #                | #                                              |
| AO080532000098 beta-1,6-N-acetylglucosaminyltransferase, contains WSC domain          | 0.442 | #                | #                                              |
| AO080536000028 Predicted protein                                                      | 0.442 | #                | #                                              |
| AO080550000149 Predicted protein                                                      | 0.441 | #                | #                                              |
| AO080513000148 Amidases                                                               | 0.44  | [01]             | [01.02]                                        |
| AO080508000396 Acetylmethionine aminotransferase                                      | 0.438 | [01]             | [01.07][01.20]                                 |
| AO080501000092 Nucleoside phosphorylase                                               | 0.437 | #                | #                                              |
| AO080521000357 Predicted protein                                                      | 0.437 | #                | #                                              |
| AO080536000070 Predicted transporter (major facilitator superfamily)                  | 0.437 | [01][20][32][34] | [01.07][20.01][20.09][32.07][34.01]            |
| AO080532000519 Predicted protein                                                      | 0.435 | #                | #                                              |
| AO080503000049 Serine threonine protein kinase                                        | 0.434 | #                | #                                              |
| AO080508000367 Predicted protein                                                      | 0.433 | [01]             | [01.04]                                        |
| AO080541000303 Predicted protein                                                      | 0.433 | #                | #                                              |
| AO080525000618 Predicted protein                                                      | 0.432 | #                | #                                              |
| AO080529000044 Predicted Zn-dependent hydrolases of the beta-lactamase fold           | 0.432 | #                | #                                              |
| AO080550000111 Predicted protein                                                      | 0.432 | #                | #                                              |
| AO080508000204 Predicted dehydrogenase                                                | 0.431 | #                | #                                              |
| AO080523000678 Predicted protein                                                      | 0.431 | [10][16]         | [10.01][16.03]                                 |
| AO080515000221 Aspartyl protease                                                      | 0.43  | [01][14]         | [01.25][14.13]                                 |
| AO080521000254 1-Acyl dihydroxyacetone phosphate reductase and related dehydrogenases | 0.427 | [01][43]         | [01.05][01.06][43.01]                          |
| AO080523000411 Predicted protein                                                      | 0.426 | #                | #                                              |
| AO080541000075 Predicted protein                                                      | 0.426 | #                | #                                              |
| AO080501000186 Predicted protein                                                      | 0.424 | #                | #                                              |
| AO080538000052 Uncharacterized conserved protein                                      | 0.419 | #                | #                                              |
| AO080508000165 FAD FMN-containing dehydrogenases                                      | 0.418 | [01]             | [01.20]                                        |
| AO080501000074 nucS nuclease S1 precursor                                             | 0.416 | [01]             | [01.03]                                        |
| AO080523000712 Permeases of the major facilitator superfamily                         | 0.416 | [01][20]         | [01.05][20.01][20.03]                          |
| AO080530000037 Signal transduction histidine kinase                                   | 0.413 | #                | #                                              |
| AO080515000068 Carboxylesterase and related proteins                                  | 0.412 | #                | #                                              |
| AO080515000315 Fructose tagatose bisphosphate aldolase                                | 0.412 | [01][02]         | [01.05][02.01][02.07]                          |
| AO080539000047 Predicted protein                                                      | 0.412 | #                | #                                              |
| AO080558000032 Permeases of the major facilitator superfamily                         | 0.41  | #                | #                                              |
| AO080550000154 Amino acid transporters                                                | 0.409 | #                | #                                              |
| AO080531000003 SAM-dependent methyltransferases                                       | 0.402 | #                | #                                              |
| AO080502000037 NADPH:quinone reductase and related Zn-dependent oxidoreductases       | 0.399 | #                | #                                              |
| AO080523000067 Predicted metal-dependent hydrolase with the TIM-barrel fold           | 0.399 | #                | #                                              |
| AO080525000576 Predicted protein                                                      | 0.398 | #                | #                                              |
| AO080515000209 Uncharacterized protein conserved in bacteria                          | 0.395 | #                | #                                              |
| AO080553000093 Predicted protein                                                      | 0.394 | #                | #                                              |
| AO080549000130 Predicted transporter (major facilitator superfamily)                  | 0.393 | [01][20][34]     | [01.05][20.01][20.03][20.09][34.01]            |

|                                                                                                            |       |                      |                                                                               |
|------------------------------------------------------------------------------------------------------------|-------|----------------------|-------------------------------------------------------------------------------|
| AO08053000032 Predicted protein                                                                            | 0.385 | #                    | #                                                                             |
| AO080533000073 Predicted protein                                                                           | 0.379 | #                    | #                                                                             |
| AO080503000122 Predicted protein                                                                           | 0.371 | #                    | #                                                                             |
| AO080513000198 Cytochrome P450 CYP2 subfamily                                                              | 0.369 | #                    | #                                                                             |
| AO080521000073 Aldo keto reductase family proteins                                                         | 0.369 | [01][02][16][32][34] | [01.01][01.05][01.06][01.07][01.20][02.01][02.16][16.21][32.01][32.10][34.11] |
| AO080521000107 Flavonol reductase cinnamoyl-CoA reductase                                                  | 0.369 | [01][02][32][42]     | [01.05][01.07][01.20][02.01][32.01][32.07][42.01]                             |
| AO080567000015 Predicted protein                                                                           | 0.369 | #                    | #                                                                             |
| AO080505000144 Predicted protein                                                                           | 0.368 | #                    | #                                                                             |
| AO080503000326 Predicted protein                                                                           | 0.367 | #                    | #                                                                             |
| AO080508000394 Predicted protein                                                                           | 0.366 | #                    | #                                                                             |
| AO080515000088 Dehydrogenases with different specificities (related to short-chain alcohol dehydrogenases) | 0.366 | [01][02][43]         | [01.05][01.06][01.20][02.25][43.01]                                           |
| AO080508000236 Predicted protein                                                                           | 0.363 | #                    | #                                                                             |
| AO080531000178 Predicted protein                                                                           | 0.362 | #                    | #                                                                             |
| AO080522000018 Fatty acid desaturase                                                                       | 0.356 | [01]                 | [01.06]                                                                       |
| AO080533000203 Cytochrome P450 CYP3 CYP5 CYP6 CYP9 subfamilies                                             | 0.355 | [01][20][32]         | [01.06][01.20][20.01][32.05][32.07]                                           |
| AO080508000166 Synaptic vesicle transporter SVOP and related transporters (major facilitator superfamily)  | 0.354 | [20]                 | [20.01]                                                                       |
| AO080541000328 1-aminocyclopropane-1-carboxylate synthase, and related proteins                            | 0.353 | [01][36][40]         | [01.02][01.05][01.20][36.02][40.02]                                           |
| AO080610000005 Predicted protein                                                                           | 0.343 | #                    | #                                                                             |
| AO080502000006 Endo-1,4-beta-glucanase IV                                                                  | 0.34  | [01]                 | [01.05][01.25]                                                                |
| AO080554000005 Predicted protein                                                                           | 0.338 | #                    | #                                                                             |
| AO080539000025 Predicted protein                                                                           | 0.332 | [10][14][20][32][42] | [10.01][10.03][14.07][20.01][32.01][32.07][42.25]                             |
| AO080515000066 Permease of the major facilitator superfamily                                               | 0.331 | [20]                 | [20.01][20.03][20.09]                                                         |
| AO080523000164 Predicted protein                                                                           | 0.328 | [32]                 | [32.07]                                                                       |
| AO080525000600 Mg <sup>2+</sup> and Co <sup>2+</sup> transporters                                          | 0.325 | #                    | #                                                                             |
| AO080530000035 Predicted protein                                                                           | 0.325 | #                    | #                                                                             |
| AO080536000027 manD, Endo-beta-mannanase                                                                   | 0.319 | [01]                 | [01.05]                                                                       |
| AO080541000084 Predicted protein                                                                           | 0.316 | [01]                 | [01.05]                                                                       |
| AO080521000262 Predicted protein                                                                           | 0.314 | #                    | #                                                                             |
| AO080525000417 Predicted protein                                                                           | 0.314 | #                    | #                                                                             |
| AO080551000032 Predicted protein                                                                           | 0.314 | #                    | #                                                                             |
| AO080541000430 Dehydrogenases with different specificities (related to short-chain alcohol dehydrogenases) | 0.309 | #                    | #                                                                             |
| AO080503000237 Predicted protein                                                                           | 0.308 | #                    | #                                                                             |
| AO080525000729 Probable taurine catabolism dioxygenase                                                     | 0.308 | [01]                 | [01.02]                                                                       |
| AO080521000084 2,4-dihydroxyhept-2-ene-1,7-dioic acid aldolase                                             | 0.302 | [01]                 | [01.20]                                                                       |
| AO080513000199 Predicted protein                                                                           | 0.299 | #                    | #                                                                             |
| AO080523000583 Predicted protein                                                                           | 0.299 | #                    | #                                                                             |
| AO080523000582 Predicted transporter (major facilitator superfamily)                                       | 0.289 | [01][20][34][41]     | [01.05][20.01][20.03][20.09][34.01][34.11][41.01]                             |
| AO080523000410 Predicted protein                                                                           | 0.288 | #                    | #                                                                             |
| AO080528000012 Predicted protein                                                                           | 0.283 | #                    | #                                                                             |
| AO080532000211 Ca <sup>2+</sup> Na <sup>+</sup> antiporter                                                 | 0.28  | #                    | #                                                                             |
| AO080503000406 Dehydrogenases with different specificities (related to short-chain alcohol dehydrogenases) | 0.276 | [01][16]             | [01.05][01.20][16.21]                                                         |
| AO080513000058 Predicted protein                                                                           | 0.275 | #                    | #                                                                             |

|                                                                                                                 |        |                      |                                                                                    |
|-----------------------------------------------------------------------------------------------------------------|--------|----------------------|------------------------------------------------------------------------------------|
| AO080562000011 Amino acid transporters                                                                          | 0.274  | [20]                 | [20.01][20.03][20.09]                                                              |
| AO080525000086 Predicted protein                                                                                | 0.271  | [01]                 | [01.05][01.25]                                                                     |
| AO080508000345 Dehydrogenases with different specificities (related to short-chain alcohol dehydrogenases)      | 0.269  | [01][02][10][16][20] | [01.05][01.06][01.07][01.20][02.07][10.03][16.01][16.21][20.01][30.05][30][32][34] |
| AO080549000389 Sorbitol dehydrogenase                                                                           | 0.269  | [01][02][16]         | [01.01][01.05][01.07][01.20][02.16][16.17][16.21]                                  |
| AO080536000095 Predicted protein                                                                                | 0.266  | #                    | #                                                                                  |
| AO080532000017 Phenylpropionate dioxygenase and related ring-hydroxylating dioxygenases, large terminal subunit | 0.263  | #                    | #                                                                                  |
| AO080554000001 H <sup>+</sup> oligopeptide symporter                                                            | 0.259  | [20]                 | [20.01][20.03][20.09]                                                              |
| AO080532000023 Predicted protein                                                                                | 0.258  | #                    | #                                                                                  |
| AO080525000588 1-aminocyclopropane-1-carboxylate synthase, and related proteins                                 | 0.251  | [01]                 | [01.02][01.05][01.20]                                                              |
| AO080510000163 Predicted protein                                                                                | 0.244  | #                    | #                                                                                  |
| AO080541000142 WD40 repeat                                                                                      | 0.243  | #                    | #                                                                                  |
| AO080513000202 Chitinase                                                                                        | 0.24   | #                    | #                                                                                  |
| AO080531000064 Predicted protein                                                                                | 0.24   | #                    | #                                                                                  |
| AO080531000061 Predicted protein                                                                                | 0.238  | #                    | #                                                                                  |
| AO080541000150 Predicted protein                                                                                | 0.228  | #                    | #                                                                                  |
| AO080549000322 Protocatechuate 3,4-dioxygenase beta subunit                                                     | 0.225  | #                    | #                                                                                  |
| AO080525000018 Predicted protein                                                                                | 0.224  | #                    | #                                                                                  |
| AO080532000465 Predicted protein                                                                                | 0.221  | #                    | #                                                                                  |
| AO080532000197 Synaptic vesicle transporter SVOP and related transporters (major facilitator superfamily)       | 0.216  | [20][32][34]         | [20.01][20.03][20.09][32.05][32.07][34.11]                                         |
| AO080530000022 Predicted protein                                                                                | 0.208  | #                    | #                                                                                  |
| AO080523000427 Permease of the major facilitator superfamily                                                    | 0.193  | #                    | #                                                                                  |
| AO080513000203 Predicted protein                                                                                | 0.19   | #                    | #                                                                                  |
| AO080521000112 Dehydrogenases with different specificities (related to short-chain alcohol dehydrogenases)      | 0.172  | [01]                 | [01.05][01.06][01.20]                                                              |
| AO080501000148 Hydroxyindole-O-methyltransferase and related SAM-dependent methyltransferases                   | 0.162  | [01]                 | [01.05][01.20]                                                                     |
| AO080501000144 Glutaminyl cyclase                                                                               | 0.155  | [01][14]             | [01.01][14.07][14.13]                                                              |
| AO080501000147 Predicted protein                                                                                | 0.151  | #                    | #                                                                                  |
| AO080532000466 Predicted protein                                                                                | 0.142  | #                    | #                                                                                  |
| AO080554000025 Amino acid transporters                                                                          | 0.14   | [20]                 | [20.01][20.09]                                                                     |
| AO080501000146 Predicted protein                                                                                | 0.136  | #                    | #                                                                                  |
| AO080501000145 Predicted protein                                                                                | 0.135  | #                    | #                                                                                  |
| AO080561000089 Endo-1,4-beta-xylanase G2                                                                        | 0.111  | [01]                 | [01.05]                                                                            |
| AO080536000049 Predicted protein                                                                                | 0.0778 | #                    | #                                                                                  |
| AO080508000347 Dehydrogenases with different specificities (related to short-chain alcohol dehydrogenases)      | 0.0748 | #                    | #                                                                                  |
| AO080522000002 Predicted protein                                                                                | 0.0479 | #                    | #                                                                                  |
| AO080513000200 Predicted protein                                                                                | 0.0336 | #                    | #                                                                                  |
| AO080501000141 Predicted protein                                                                                | 0.0322 | #                    | #                                                                                  |

<sup>a</sup> FunCat (<http://www.webcitation.org/getfile?fileid=be4936ae25ebb5dfb89b687842ea640f8acf7790>) is the organism independent functional description of proteins. FunCat consists of 28 main functional categories (level 1). The level 1 is the most general one, whereas level 2 shows much more detail.

<sup>b</sup> #: Unclassified gene

<sup>c</sup> Detailed descriptions of each category are available at the MIPS Functional Catalogue Database (<http://mips.helmholtz-muenchen.de/proj/funcatDB/>)
